# Supplementary material
Source: PubMed Central journal article supplement (PMC2882639)
Supplement: NIHMS207349-supplement-1_si_001.pdf [file NIHMS207349-supplement-1_si_001.pdf]

## Supporting Information

### One-electron oxidation of DNA by ionizing radiation: competition between base-to-base hole-transfer and hole-trapping

Kiran K. K. Sharma, Rahul Tyagi, Shubhadeep Purkayastha, and William A. Bernhard<sup>1</sup>

*Department of Biochemistry & Biophysics, University of Rochester, Rochester, NY 14642, USA*

#### A) Derivation of Equation 3

#### B) Table S1

#### C) References

#### A. Derivation of Equation 3

The total chemical yield of free base release,  $G_{\text{tot}}(\text{fbr})$ , is

$$G_{\text{tot}}(\text{fbr}) = G(\text{Cyt}) + G(\text{Gua}) + G(\text{Thy}) + G(\text{Ade}) \quad (\text{S1})$$

The mol fraction of a given base X,  $F(X)$ , is

$$F(X) = \frac{\text{number of X}}{\text{number of all bases}}$$

For normal DNA sequences,

$$F(\text{Cyt}) + F(\text{Gua}) + F(\text{Thy}) + F(\text{Ade}) = 1 \text{ and}$$

$$F(\text{Cyt}) = F(\text{Gua}), F(\text{Thy}) = F(\text{Ade}) \quad (\text{S2})$$

thus

$$F(\text{Thy}) = 0.5 - F(\text{Cyt}) \quad (\text{S3})$$

By definition of the M-factor

$$M(\text{Cyt}) = \frac{G(\text{Cyt})}{G_{\text{tot}}(\text{fbr}) \times F(\text{Cyt})}, M(\text{Gua}) = \frac{G(\text{Gua})}{G_{\text{tot}}(\text{fbr}) \times F(\text{Gua})}, \text{ etc.}$$

It follows that

$$M(\text{Cyt}) \times F(\text{Cyt}) + M(\text{Gua}) \times F(\text{Gua}) + M(\text{Thy}) \times F(\text{Thy}) + M(\text{Ade}) \times F(\text{Ade}) = 1 \quad (\text{S4})$$

Substituting S2 and S3 into S4 and rearranging gives

$$M(\text{Cyt}) = -M(\text{Gua}) + \frac{1 - [M(\text{Thy}) + M(\text{Ade})] \times [0.5 - F(\text{Cyt})]}{F(\text{Cyt})} \quad (\text{S5})$$

In the manuscript Equation S5 is labeled Equation 3.



etc. **CG** | p p p p p p p p p p p p p p p p p  
**CC** | p p p p p p p p p p p p p p p p p

| <i>C. perfringens</i> |    | forward strand |          |          |          |          |          |          |          |          |          |          |          |          |          |          |          |
|-----------------------|----|----------------|----------|----------|----------|----------|----------|----------|----------|----------|----------|----------|----------|----------|----------|----------|----------|
| A                     | AA | AC             | AG       | AT       | CA       | CC       | CG       | CT       | GA       | GC       | GG       | GT       | TA       | TC       | TG       | TT       |          |
|                       | AA | 0.019709       | 0.006569 | 0.011325 | 0.018067 | 0.005140 | 0.002596 | 0.000488 | 0.007589 | 0.010900 | 0.005063 | 0.005415 | 0.007997 | 0.018346 | 0.007202 | 0.006880 | 0.014604 |
|                       | AC | 0.004858       | 0.002119 | 0.002435 | 0.003738 | 0.001144 | 0.001172 | 0.000146 | 0.001532 | 0.001982 | 0.001584 | 0.001382 | 0.001860 | 0.004432 | 0.002528 | 0.001570 | 0.004312 |
|                       | AG | 0.010404       | 0.002475 | 0.006316 | 0.006932 | 0.001435 | 0.000848 | 0.000225 | 0.001668 | 0.004071 | 0.001670 | 0.002691 | 0.002858 | 0.006730 | 0.001318 | 0.004084 | 0.006107 |
|                       | AT | 0.018571       | 0.005050 | 0.007236 | 0.014262 | 0.004185 | 0.002630 | 0.000458 | 0.005611 | 0.006773 | 0.003946 | 0.003145 | 0.005514 | 0.015023 | 0.006180 | 0.006019 | 0.016476 |
|                       | CA | 0.006135       | 0.001817 | 0.003489 | 0.005012 | 0.002911 | 0.001146 | 0.000357 | 0.003724 | 0.002557 | 0.001294 | 0.001334 | 0.002301 | 0.005205 | 0.001396 | 0.001818 | 0.004320 |
|                       | CC | 0.002816       | 0.001615 | 0.001482 | 0.002237 | 0.001229 | 0.001374 | 0.000143 | 0.001428 | 0.001294 | 0.001176 | 0.000673 | 0.001478 | 0.003913 | 0.002220 | 0.001363 | 0.004289 |
|                       | CG | 0.000624       | 0.000219 | 0.000450 | 0.000455 | 0.000122 | 0.000069 | 0.000055 | 0.000106 | 0.000171 | 0.000103 | 0.000107 | 0.000149 | 0.000420 | 0.000078 | 0.000222 | 0.000470 |
|                       | CT | 0.008782       | 0.001930 | 0.003531 | 0.006347 | 0.002742 | 0.001095 | 0.000344 | 0.003292 | 0.002003 | 0.001217 | 0.000864 | 0.001823 | 0.007588 | 0.002206 | 0.002805 | 0.007878 |
|                       | GA | 0.009757       | 0.002573 | 0.003970 | 0.006953 | 0.002029 | 0.001171 | 0.000221 | 0.003030 | 0.005858 | 0.002235 | 0.002249 | 0.003804 | 0.006153 | 0.002217 | 0.002164 | 0.006291 |
|                       | GC | 0.002958       | 0.001455 | 0.001330 | 0.002482 | 0.000707 | 0.000875 | 0.000084 | 0.000958 | 0.001306 | 0.001252 | 0.000898 | 0.001209 | 0.002481 | 0.001657 | 0.000755 | 0.002954 |
|                       | GG | 0.004425       | 0.001718 | 0.002563 | 0.004333 | 0.001051 | 0.000505 | 0.000133 | 0.000923 | 0.002834 | 0.001494 | 0.001253 | 0.002043 | 0.002934 | 0.000978 | 0.001506 | 0.003782 |
|                       | GT | 0.005266       | 0.001909 | 0.002369 | 0.004431 | 0.001459 | 0.000935 | 0.000153 | 0.001670 | 0.002405 | 0.001496 | 0.001134 | 0.001823 | 0.004123 | 0.001988 | 0.001796 | 0.005369 |
|                       | TA | 0.020108       | 0.004861 | 0.010623 | 0.016978 | 0.004926 | 0.001985 | 0.000558 | 0.006966 | 0.006461 | 0.003063 | 0.004015 | 0.006627 | 0.016029 | 0.004914 | 0.006030 | 0.012787 |
|                       | TC | 0.005861       | 0.002987 | 0.002225 | 0.004238 | 0.001412 | 0.001653 | 0.000184 | 0.002149 | 0.001904 | 0.001991 | 0.001244 | 0.001911 | 0.006112 | 0.004082 | 0.001889 | 0.006551 |
|                       | TG | 0.007787       | 0.002066 | 0.004900 | 0.005117 | 0.001100 | 0.000733 | 0.000236 | 0.001316 | 0.002073 | 0.001226 | 0.001543 | 0.001915 | 0.005514 | 0.001381 | 0.003695 | 0.004939 |
|                       | TT | 0.020033       | 0.005554 | 0.006988 | 0.014714 | 0.005043 | 0.002808 | 0.000587 | 0.006213 | 0.007216 | 0.004255 | 0.003508 | 0.005062 | 0.016141 | 0.006391 | 0.005872 | 0.018502 |
|                       |    |                |          |          |          |          |          |          |          |          |          |          |          |          |          |          |          |
| C                     | AA | 0.012898       | 0.004141 | 0.006937 | 0.012651 | 0.005897 | 0.002380 | 0.000626 | 0.007982 | 0.001060 | 0.000788 | 0.000788 | 0.001317 | 0.014826 | 0.008668 | 0.006871 | 0.021652 |
|                       | AC | 0.006054       | 0.002748 | 0.003888 | 0.007600 | 0.001996 | 0.001561 | 0.000263 | 0.002784 | 0.000499 | 0.000478 | 0.000276 | 0.000722 | 0.006540 | 0.003795 | 0.003491 | 0.009740 |
|                       | AG | 0.009247       | 0.003126 | 0.005559 | 0.009148 | 0.003659 | 0.001525 | 0.000558 | 0.004697 | 0.000953 | 0.000393 | 0.000669 | 0.001072 | 0.012607 | 0.005359 | 0.006476 | 0.014790 |
|                       | AT | 0.013087       | 0.004427 | 0.005941 | 0.014603 | 0.009112 | 0.003141 | 0.000643 | 0.010706 | 0.000790 | 0.000531 | 0.000386 | 0.001072 | 0.016484 | 0.007659 | 0.005776 | 0.019535 |
|                       | CA | 0.004126       | 0.001134 | 0.001796 | 0.004151 | 0.005073 | 0.001289 | 0.000467 | 0.005534 | 0.000408 | 0.000312 | 0.000236 | 0.000412 | 0.004483 | 0.001966 | 0.001306 | 0.007370 |
|                       | CC | 0.002257       | 0.000996 | 0.001136 | 0.004170 | 0.001922 | 0.000943 | 0.000187 | 0.003015 | 0.000172 | 0.000248 | 0.000176 | 0.000295 | 0.003000 | 0.002270 | 0.001365 | 0.005311 |
|                       | CG | 0.000696       | 0.000212 | 0.000389 | 0.000624 | 0.000671 | 0.000231 | 0.000180 | 0.000771 | 0.000144 | 0.000032 | 0.000117 | 0.000076 | 0.000883 | 0.000452 | 0.000643 | 0.001094 |
|                       | CT | 0.005088       | 0.001822 | 0.002323 | 0.006963 | 0.009020 | 0.002442 | 0.000667 | 0.008608 | 0.000274 | 0.000291 | 0.000172 | 0.000556 | 0.009439 | 0.004421 | 0.003578 | 0.015170 |
|                       | GA | 0.003565       | 0.000932 | 0.001240 | 0.003342 | 0.002227 | 0.000639 | 0.000240 | 0.002155 | 0.000535 | 0.000272 | 0.000350 | 0.000416 | 0.002457 | 0.001206 | 0.001028 | 0.005215 |
|                       | GC | 0.001979       | 0.001195 | 0.001066 | 0.004039 | 0.001023 | 0.000926 | 0.000108 | 0.001372 | 0.000338 | 0.000482 | 0.000149 | 0.000463 | 0.001847 | 0.001822 | 0.000898 | 0.004962 |
|                       | GG | 0.002769       | 0.000854 | 0.001539 | 0.003034 | 0.000932 | 0.000401 | 0.000210 | 0.000941 | 0.000429 | 0.000323 | 0.000412 | 0.000484 | 0.002867 | 0.001614 | 0.001690 | 0.004215 |
|                       | GT | 0.002743       | 0.000856 | 0.001323 | 0.003627 | 0.002767 | 0.000775 | 0.000206 | 0.002852 | 0.000225 | 0.000214 | 0.000176 | 0.000344 | 0.003620 | 0.001624 | 0.001204 | 0.005561 |
|                       | TA | 0.011477       | 0.003506 | 0.006625 | 0.011197 | 0.007262 | 0.002247 | 0.000660 | 0.008031 | 0.001070 | 0.000677 | 0.000771 | 0.001272 | 0.012847 | 0.006086 | 0.005867 | 0.016442 |
|                       | TC | 0.009502       | 0.005260 | 0.005247 | 0.013063 | 0.003601 | 0.002608 | 0.000323 | 0.004716 | 0.000531 | 0.000739 | 0.000221 | 0.001040 | 0.010335 | 0.007200 | 0.005818 | 0.014607 |
|                       | TG | 0.007360       | 0.002166 | 0.003937 | 0.006277 | 0.003075 | 0.001221 | 0.000493 | 0.003111 | 0.000495 | 0.000289 | 0.000352 | 0.000592 | 0.009056 | 0.004283 | 0.005024 | 0.009400 |
|                       | TT | 0.016308       | 0.005958 | 0.007612 | 0.020317 | 0.012524 | 0.004793 | 0.001055 | 0.016030 | 0.000998 | 0.000807 | 0.000561 | 0.001580 | 0.021523 | 0.011940 | 0.007615 | 0.031862 |
|                       |    |                |          |          |          |          |          |          |          |          |          |          |          |          |          |          |          |
| G                     | AA | 0.028835       | 0.004926 | 0.012946 | 0.018455 | 0.009248 | 0.004172 | 0.001092 | 0.014896 | 0.013570 | 0.004926 | 0.005107 | 0.009330 | 0.016579 | 0.006144 | 0.007148 | 0.022423 |
|                       | AC | 0.001524       | 0.000236 | 0.000593 | 0.000962 | 0.000560 | 0.000554 | 0.000084 | 0.001021 | 0.000852 | 0.000567 | 0.000307 | 0.000620 | 0.001147 | 0.000609 | 0.000518 | 0.001388 |
|                       | AG | 0.014720       | 0.002778 | 0.007715 | 0.010307 | 0.003314 | 0.001010 | 0.000642 | 0.004761 | 0.004569 | 0.001449 | 0.002831 | 0.002883 | 0.007316 | 0.002080 | 0.004975 | 0.008030 |
|                       | AT | 0.019624       | 0.003415 | 0.006793 | 0.014245 | 0.006279 | 0.002747 | 0.000503 | 0.009140 | 0.012513 | 0.003956 | 0.004108 | 0.007419 | 0.011115 | 0.003446 | 0.004006 | 0.013286 |
|                       | CA | 0.007064       | 0.000922 | 0.002952 | 0.005487 | 0.005487 | 0.001930 | 0.000556 | 0.007080 | 0.005140 | 0.000991 | 0.001310 | 0.003104 | 0.006054 | 0.001116 | 0.001399 | 0.007775 |
|                       | CC | 0.000816       | 0.000146 | 0.000205 | 0.000490 | 0.000578 | 0.000532 | 0.000143 | 0.000812 | 0.000276 | 0.000146 | 0.000199 | 0.000282 | 0.000991 | 0.000410 | 0.000349 | 0.000955 |
|                       | CG | 0.000924       | 0.000141 | 0.000598 | 0.000587 | 0.000468 | 0.000205 | 0.000201 | 0.000543 | 0.000353 | 0.000132 | 0.000238 | 0.000234 | 0.000609 | 0.000192 | 0.000435 | 0.000503 |
|                       | CT | 0.007651       | 0.001222 | 0.002380 | 0.006376 | 0.004609 | 0.001752 | 0.000402 | 0.006420 | 0.005401 | 0.001368 | 0.001372 | 0.004205 | 0.006813 | 0.001438 | 0.001966 | 0.007196 |
|                       | GA | 0.010638       | 0.001423 | 0.004070 | 0.007121 | 0.004009 | 0.001573 | 0.000501 | 0.005365 | 0.006777 | 0.001763 | 0.002169 | 0.003439 | 0.005809 | 0.001280 | 0.001933 | 0.008606 |
|                       | GC | 0.000918       | 0.000276 | 0.000320 | 0.000691 | 0.000364 | 0.000320 | 0.000015 | 0.000483 | 0.000585 | 0.000443 | 0.000203 | 0.000446 | 0.000781 | 0.000349 | 0.000373 | 0.000885 |
|                       | GG | 0.004862       | 0.000827 | 0.002623 | 0.003161 | 0.001308 | 0.000410 | 0.000307 | 0.001692 | 0.002725 | 0.000880 | 0.001088 | 0.001535 | 0.002299 | 0.000580 | 0.001196 | 0.002769 |
|                       | GT | 0.005963       | 0.000946 | 0.001886 | 0.004684 | 0.002261 | 0.000891 | 0.000225 | 0.003239 | 0.005266 | 0.001165 | 0.001160 | 0.002967 | 0.003682 | 0.000898 | 0.001167 | 0.004229 |
|                       | TA | 0.019690       | 0.003219 | 0.008549 | 0.015042 | 0.009517 | 0.003188 | 0.001083 | 0.013709 | 0.010177 | 0.002050 | 0.003080 | 0.006612 | 0.013169 | 0.003009 | 0.004741 | 0.015024 |
|                       | TC | 0.001167       | 0.000214 | 0.000210 | 0.000880 | 0.000505 | 0.000525 | 0.000135 | 0.000880 | 0.000547 | 0.000276 | 0.000236 | 0.000390 | 0.001251 | 0.000812 | 0.000446 | 0.001308 |

|   |    |                      |          |                       |          |          |          |          |          |          |          |          |          |          |          |          |          |  |
|---|----|----------------------|----------|-----------------------|----------|----------|----------|----------|----------|----------|----------|----------|----------|----------|----------|----------|----------|--|
|   | TG | 0.012599             | 0.002824 | 0.008469              | 0.009231 | 0.003446 | 0.000955 | 0.000585 | 0.003896 | 0.003821 | 0.001222 | 0.002061 | 0.002138 | 0.007064 | 0.002361 | 0.005096 | 0.006338 |  |
|   | TT | 0.017120             | 0.002921 | 0.005760              | 0.014033 | 0.007508 | 0.002782 | 0.000649 | 0.010206 | 0.010215 | 0.002486 | 0.002621 | 0.006413 | 0.012134 | 0.004103 | 0.004426 | 0.014115 |  |
|   |    |                      |          |                       |          |          |          |          |          |          |          |          |          |          |          |          |          |  |
| T |    | AA                   | AC       | AG                    | AT       | CA       | CC       | CG       | CT       | GA       | GC       | GG       | GT       | TA       | TC       | TG       | TT       |  |
|   | AA | 0.016881             | 0.004971 | 0.006827              | 0.015652 | 0.004658 | 0.003872 | 0.000420 | 0.006386 | 0.005887 | 0.002601 | 0.003880 | 0.004025 | 0.011942 | 0.006333 | 0.004179 | 0.014479 |  |
|   | AC | 0.004900             | 0.001820 | 0.001636              | 0.005435 | 0.001794 | 0.002160 | 0.000154 | 0.003044 | 0.001722 | 0.001177 | 0.001339 | 0.001727 | 0.006069 | 0.003873 | 0.002332 | 0.007870 |  |
|   | AG | 0.005832             | 0.001638 | 0.002900              | 0.005651 | 0.001368 | 0.001017 | 0.000149 | 0.001928 | 0.002069 | 0.000905 | 0.001447 | 0.001486 | 0.006712 | 0.003021 | 0.003098 | 0.007819 |  |
|   | AT | 0.014009             | 0.004371 | 0.005528              | 0.014551 | 0.004856 | 0.004317 | 0.000366 | 0.007272 | 0.004257 | 0.002379 | 0.002366 | 0.003817 | 0.016737 | 0.007428 | 0.005182 | 0.018729 |  |
|   | CA | 0.005732             | 0.001756 | 0.002796              | 0.006119 | 0.003691 | 0.001568 | 0.000226 | 0.004575 | 0.001811 | 0.000745 | 0.001240 | 0.001592 | 0.006051 | 0.002108 | 0.001959 | 0.007430 |  |
|   | CC | 0.003570             | 0.001180 | 0.000840              | 0.003064 | 0.001425 | 0.001347 | 0.000111 | 0.003113 | 0.001292 | 0.001056 | 0.000811 | 0.001435 | 0.004050 | 0.002568 | 0.001392 | 0.005735 |  |
|   | CG | 0.000599             | 0.000155 | 0.000338              | 0.000498 | 0.000273 | 0.000141 | 0.000068 | 0.000346 | 0.000236 | 0.000095 | 0.000142 | 0.000169 | 0.000588 | 0.000226 | 0.000300 | 0.000631 |  |
|   | CT | 0.006787             | 0.002404 | 0.003485              | 0.007091 | 0.005075 | 0.002767 | 0.000444 | 0.007456 | 0.002510 | 0.001415 | 0.001540 | 0.002571 | 0.010289 | 0.004312 | 0.003745 | 0.012190 |  |
|   | GA | 0.005725             | 0.001792 | 0.001968              | 0.005593 | 0.001200 | 0.000947 | 0.000102 | 0.001402 | 0.003574 | 0.001432 | 0.001977 | 0.002196 | 0.004445 | 0.002126 | 0.001358 | 0.006947 |  |
|   | GC | 0.003848             | 0.001435 | 0.001019              | 0.003742 | 0.001097 | 0.001500 | 0.000106 | 0.001974 | 0.001722 | 0.001229 | 0.001097 | 0.001406 | 0.002850 | 0.002508 | 0.001329 | 0.004989 |  |
|   | GG | 0.002447             | 0.000838 | 0.000898              | 0.002439 | 0.000619 | 0.000450 | 0.000059 | 0.000873 | 0.001455 | 0.000739 | 0.001247 | 0.001022 | 0.001985 | 0.001107 | 0.001029 | 0.002645 |  |
|   | GT | 0.005226             | 0.001862 | 0.001883              | 0.005010 | 0.001927 | 0.001805 | 0.000169 | 0.002716 | 0.002454 | 0.001289 | 0.001407 | 0.001830 | 0.004888 | 0.002672 | 0.001841 | 0.006975 |  |
|   | TA | 0.015341             | 0.003994 | 0.007207              | 0.015034 | 0.005548 | 0.003013 | 0.000347 | 0.007314 | 0.005595 | 0.002342 | 0.003658 | 0.004335 | 0.015991 | 0.006234 | 0.005281 | 0.019220 |  |
|   | TC | 0.007632             | 0.002838 | 0.002180              | 0.007613 | 0.002012 | 0.003295 | 0.000131 | 0.004788 | 0.002019 | 0.001606 | 0.001507 | 0.002107 | 0.006755 | 0.006886 | 0.002987 | 0.012006 |  |
|   | TG | 0.004667             | 0.001457 | 0.002525              | 0.004295 | 0.001108 | 0.001001 | 0.000110 | 0.001600 | 0.001368 | 0.000783 | 0.001227 | 0.001131 | 0.004716 | 0.002275 | 0.002590 | 0.005311 |  |
|   | TT | 0.019741             | 0.005577 | 0.008550              | 0.018766 | 0.008103 | 0.004854 | 0.000585 | 0.011623 | 0.005977 | 0.003002 | 0.003021 | 0.005099 | 0.020802 | 0.010768 | 0.006320 | 0.021268 |  |
|   |    |                      |          |                       |          |          |          |          |          |          |          |          |          |          |          |          |          |  |
|   |    | <b>C. perfingens</b> |          | <b>reverse strand</b> |          |          |          |          |          |          |          |          |          |          |          |          |          |  |
|   |    |                      |          |                       |          |          |          |          |          |          |          |          |          |          |          |          |          |  |
| A |    | AA                   | AC       | AG                    | AT       | CA       | CC       | CG       | CT       | GA       | GC       | GG       | GT       | TA       | TC       | TG       | TT       |  |
|   | AA | 0.021268             | 0.006975 | 0.012190              | 0.018729 | 0.005311 | 0.002645 | 0.000631 | 0.007819 | 0.012006 | 0.004989 | 0.005735 | 0.007870 | 0.019220 | 0.006947 | 0.007430 | 0.014479 |  |
|   | AC | 0.005099             | 0.001830 | 0.002571              | 0.003817 | 0.001131 | 0.001022 | 0.000169 | 0.001486 | 0.002107 | 0.001406 | 0.001435 | 0.001727 | 0.004335 | 0.002196 | 0.001592 | 0.004025 |  |
|   | AG | 0.011623             | 0.002716 | 0.007456              | 0.007272 | 0.001600 | 0.000873 | 0.000346 | 0.001928 | 0.004788 | 0.001974 | 0.003113 | 0.003044 | 0.007314 | 0.001402 | 0.004575 | 0.006386 |  |
|   | AT | 0.018766             | 0.005010 | 0.007091              | 0.014551 | 0.004295 | 0.002439 | 0.000498 | 0.005651 | 0.007613 | 0.003742 | 0.003064 | 0.005435 | 0.015034 | 0.005593 | 0.006119 | 0.015652 |  |
|   | CA | 0.006320             | 0.001841 | 0.003745              | 0.005182 | 0.002590 | 0.001029 | 0.000300 | 0.003098 | 0.002987 | 0.001329 | 0.001392 | 0.002332 | 0.005281 | 0.001358 | 0.001959 | 0.004179 |  |
|   | CC | 0.003021             | 0.001407 | 0.001540              | 0.002366 | 0.001227 | 0.001247 | 0.000142 | 0.001447 | 0.001507 | 0.001097 | 0.000811 | 0.001339 | 0.003658 | 0.001977 | 0.001240 | 0.003880 |  |
|   | CG | 0.000585             | 0.000169 | 0.000444              | 0.000366 | 0.000110 | 0.000059 | 0.000068 | 0.000149 | 0.000131 | 0.000106 | 0.000111 | 0.000154 | 0.000347 | 0.000102 | 0.000226 | 0.000420 |  |
|   | CT | 0.008550             | 0.001883 | 0.003485              | 0.005528 | 0.002525 | 0.000898 | 0.000338 | 0.002900 | 0.002180 | 0.001019 | 0.000840 | 0.001636 | 0.007207 | 0.001968 | 0.002796 | 0.006827 |  |
|   | GA | 0.010768             | 0.002672 | 0.004312              | 0.007428 | 0.002275 | 0.001107 | 0.000226 | 0.003021 | 0.006886 | 0.002508 | 0.002568 | 0.003873 | 0.006234 | 0.002126 | 0.002108 | 0.006333 |  |
|   | GC | 0.003002             | 0.001289 | 0.001415              | 0.002379 | 0.000783 | 0.000739 | 0.000095 | 0.000905 | 0.001606 | 0.001229 | 0.001056 | 0.001177 | 0.002342 | 0.001432 | 0.000745 | 0.002601 |  |
|   | GG | 0.004854             | 0.001805 | 0.002767              | 0.004317 | 0.001001 | 0.000450 | 0.000141 | 0.001017 | 0.003295 | 0.001500 | 0.001347 | 0.002160 | 0.003013 | 0.000947 | 0.001568 | 0.003872 |  |
|   | GT | 0.005577             | 0.001862 | 0.002404              | 0.004371 | 0.001457 | 0.000838 | 0.000155 | 0.001638 | 0.002838 | 0.001435 | 0.001180 | 0.001820 | 0.003994 | 0.001792 | 0.001756 | 0.004971 |  |
|   | TA | 0.020802             | 0.004888 | 0.010289              | 0.016737 | 0.004716 | 0.001985 | 0.000588 | 0.006712 | 0.006755 | 0.002850 | 0.004050 | 0.006069 | 0.015991 | 0.004445 | 0.006051 | 0.011942 |  |
|   | TC | 0.005977             | 0.002454 | 0.002510              | 0.004257 | 0.001368 | 0.001455 | 0.000236 | 0.002069 | 0.002019 | 0.001722 | 0.001292 | 0.001722 | 0.005595 | 0.003574 | 0.001811 | 0.005887 |  |
|   | TG | 0.008103             | 0.001927 | 0.005075              | 0.004856 | 0.001108 | 0.000619 | 0.000273 | 0.001368 | 0.002012 | 0.001097 | 0.001425 | 0.001794 | 0.005548 | 0.001200 | 0.003691 | 0.004658 |  |
|   | TT | 0.019741             | 0.005226 | 0.006787              | 0.014009 | 0.004667 | 0.002447 | 0.000599 | 0.005832 | 0.007632 | 0.003848 | 0.003570 | 0.004900 | 0.015341 | 0.005725 | 0.005732 | 0.016881 |  |
|   |    |                      |          |                       |          |          |          |          |          |          |          |          |          |          |          |          |          |  |
| C |    | AA                   | AC       | AG                    | AT       | CA       | CC       | CG       | CT       | GA       | GC       | GG       | GT       | TA       | TC       | TG       | TT       |  |
|   | AA | 0.014115             | 0.004229 | 0.007196              | 0.013286 | 0.006338 | 0.002769 | 0.000503 | 0.008030 | 0.001308 | 0.000885 | 0.000955 | 0.001388 | 0.015024 | 0.008606 | 0.007775 | 0.022423 |  |
|   | AC | 0.006413             | 0.002967 | 0.004205              | 0.007419 | 0.002138 | 0.001535 | 0.000234 | 0.002883 | 0.000390 | 0.000446 | 0.000282 | 0.000620 | 0.006612 | 0.003439 | 0.003104 | 0.009330 |  |
|   | AG | 0.010206             | 0.003239 | 0.006420              | 0.009140 | 0.003896 | 0.001692 | 0.000543 | 0.004761 | 0.000880 | 0.000483 | 0.000812 | 0.001021 | 0.013709 | 0.005365 | 0.007080 | 0.014896 |  |
|   | AT | 0.014033             | 0.004684 | 0.006376              | 0.014245 | 0.009231 | 0.003161 | 0.000587 | 0.010307 | 0.000880 | 0.000691 | 0.000490 | 0.000962 | 0.015042 | 0.007121 | 0.005487 | 0.018455 |  |
|   | CA | 0.004426             | 0.001167 | 0.001966              | 0.004006 | 0.005096 | 0.001196 | 0.000435 | 0.004975 | 0.000446 | 0.000373 | 0.000349 | 0.000518 | 0.004741 | 0.001933 | 0.001399 | 0.007148 |  |
|   | CC | 0.002621             | 0.001160 | 0.001372              | 0.004108 | 0.002061 | 0.001088 | 0.000238 | 0.002831 | 0.000236 | 0.000203 | 0.000199 | 0.000307 | 0.003080 | 0.002169 | 0.001310 | 0.005107 |  |
|   | CG | 0.000649             | 0.000225 | 0.000402              | 0.000503 | 0.000585 | 0.000307 | 0.000201 | 0.000642 | 0.000135 | 0.000015 | 0.000143 | 0.000084 | 0.001083 | 0.000501 | 0.000556 | 0.001092 |  |
|   | CT | 0.005760             | 0.001886 | 0.002380              | 0.006793 | 0.008469 | 0.002623 | 0.000598 | 0.007715 | 0.000210 | 0.000320 | 0.000205 | 0.000593 | 0.008549 | 0.004070 | 0.002952 | 0.012946 |  |
|   | GA | 0.004103             | 0.000898 | 0.001438              | 0.003446 | 0.002361 | 0.000580 | 0.000192 | 0.002080 | 0.000812 | 0.000349 | 0.000410 | 0.000609 | 0.003009 | 0.001280 | 0.001116 | 0.006144 |  |
|   | GC | 0.002486             | 0.001165 | 0.001368              | 0.003956 | 0.001222 | 0.000880 | 0.000132 | 0.001449 | 0.000276 | 0.000443 | 0.000146 | 0.000567 | 0.002050 | 0.001763 | 0.000991 | 0.004926 |  |
|   | GG | 0.002782             | 0.000891 | 0.001752              | 0.002747 | 0.000955 | 0.000410 | 0.000205 | 0.001010 | 0.000525 | 0.000320 | 0.000532 | 0.000554 | 0.003188 | 0.001573 | 0.001930 | 0.004172 |  |
|   | GT | 0.002921             | 0.000946 | 0.001222              | 0.003415 | 0.002824 | 0.000827 | 0.000141 | 0.002778 | 0.000214 | 0.000276 | 0.000146 | 0.000236 | 0.003219 | 0.001423 | 0.000922 | 0.004926 |  |



|   |    |          |          |          |          |          |          |          |          |          |          |          |          |          |          |          |          |
|---|----|----------|----------|----------|----------|----------|----------|----------|----------|----------|----------|----------|----------|----------|----------|----------|----------|
|   | GG | 0.007485 | 0.002994 | 0.010479 | 0.001497 | 0.000000 | 0.000000 | 0.000000 | 0.001497 | 0.004491 | 0.001497 | 0.001497 | 0.000000 | 0.005988 | 0.005988 | 0.002994 | 0.002994 |
|   | GT | 0.005988 | 0.005988 | 0.008982 | 0.002994 | 0.000000 | 0.001497 | 0.000000 | 0.002994 | 0.001497 | 0.002994 | 0.004491 | 0.001497 | 0.001497 | 0.005988 | 0.004491 | 0.004491 |
|   | TA | 0.007485 | 0.004491 | 0.005988 | 0.002994 | 0.001497 | 0.002994 | 0.002994 | 0.007485 | 0.004491 | 0.001497 | 0.004491 | 0.004491 | 0.002994 | 0.002994 | 0.002994 | 0.004491 |
|   | TC | 0.004491 | 0.001497 | 0.005988 | 0.004491 | 0.005988 | 0.004491 | 0.007485 | 0.005988 | 0.004491 | 0.010479 | 0.007485 | 0.004491 | 0.002994 | 0.002994 | 0.008982 | 0.004491 |
|   | TG | 0.004491 | 0.000000 | 0.005988 | 0.004491 | 0.004491 | 0.000000 | 0.005988 | 0.004491 | 0.005988 | 0.001497 | 0.005988 | 0.001497 | 0.005988 | 0.001497 | 0.000000 | 0.000000 |
|   | TT | 0.005988 | 0.002994 | 0.002994 | 0.007485 | 0.001497 | 0.007485 | 0.002994 | 0.002994 | 0.001497 | 0.002994 | 0.000000 | 0.000000 | 0.000000 | 0.014970 | 0.001497 | 0.004491 |
|   |    |          |          |          |          |          |          |          |          |          |          |          |          |          |          |          |          |
| C |    | AA       | AC       | AG       | AT       | CA       | CC       | CG       | CT       | GA       | GC       | GG       | GT       | TA       | TC       | TG       | TT       |
|   | AA | 0.002963 | 0.000000 | 0.004444 | 0.002963 | 0.005926 | 0.005926 | 0.001481 | 0.004444 | 0.004444 | 0.004444 | 0.000000 | 0.002963 | 0.005926 | 0.004444 | 0.002963 | 0.004444 |
|   | AC | 0.002963 | 0.001481 | 0.004444 | 0.004444 | 0.004444 | 0.001481 | 0.002963 | 0.001481 | 0.002963 | 0.010370 | 0.002963 | 0.001481 | 0.004444 | 0.001481 | 0.004444 | 0.001481 |
|   | AG | 0.005926 | 0.001481 | 0.010370 | 0.005926 | 0.004444 | 0.002963 | 0.002963 | 0.001481 | 0.002963 | 0.001481 | 0.008889 | 0.002963 | 0.002963 | 0.011852 | 0.005926 | 0.002963 |
|   | AT | 0.004444 | 0.004444 | 0.010370 | 0.004444 | 0.005926 | 0.002963 | 0.007407 | 0.002963 | 0.001481 | 0.001481 | 0.002963 | 0.004444 | 0.001481 | 0.004444 | 0.004444 | 0.007407 |
|   | CA | 0.004444 | 0.001481 | 0.004444 | 0.005926 | 0.002963 | 0.001481 | 0.002963 | 0.004444 | 0.005926 | 0.004444 | 0.001481 | 0.001481 | 0.001481 | 0.004444 | 0.007407 | 0.000000 |
|   | CC | 0.002963 | 0.002963 | 0.002963 | 0.001481 | 0.002963 | 0.008889 | 0.005926 | 0.002963 | 0.004444 | 0.001481 | 0.005926 | 0.004444 | 0.000000 | 0.001481 | 0.004444 | 0.002963 |
|   | CG | 0.004444 | 0.002963 | 0.005926 | 0.001481 | 0.010370 | 0.001481 | 0.000000 | 0.004444 | 0.001481 | 0.007407 | 0.001481 | 0.004444 | 0.001481 | 0.017778 | 0.007407 | 0.005926 |
|   | CT | 0.008889 | 0.011852 | 0.004444 | 0.005926 | 0.004444 | 0.005926 | 0.004444 | 0.002963 | 0.001481 | 0.002963 | 0.001481 | 0.004444 | 0.001481 | 0.002963 | 0.002963 | 0.008889 |
|   | GA | 0.001481 | 0.004444 | 0.002963 | 0.001481 | 0.000000 | 0.002963 | 0.002963 | 0.000000 | 0.001481 | 0.002963 | 0.004444 | 0.002963 | 0.001481 | 0.004444 | 0.001481 | 0.001481 |
|   | GC | 0.002963 | 0.005926 | 0.013333 | 0.005926 | 0.000000 | 0.002963 | 0.005926 | 0.001481 | 0.001481 | 0.005926 | 0.005926 | 0.000000 | 0.002963 | 0.002963 | 0.004444 | 0.002963 |
|   | GG | 0.002963 | 0.001481 | 0.002963 | 0.002963 | 0.005926 | 0.002963 | 0.004444 | 0.002963 | 0.013333 | 0.005926 | 0.005926 | 0.005926 | 0.001481 | 0.002963 | 0.005926 | 0.004444 |
|   | GT | 0.001481 | 0.004444 | 0.005926 | 0.005926 | 0.001481 | 0.000000 | 0.001481 | 0.002963 | 0.001481 | 0.000000 | 0.002963 | 0.007407 | 0.004444 | 0.001481 | 0.004444 | 0.001481 |
|   | TA | 0.000000 | 0.001481 | 0.002963 | 0.002963 | 0.004444 | 0.000000 | 0.010370 | 0.002963 | 0.002963 | 0.002963 | 0.007407 | 0.000000 | 0.000000 | 0.004444 | 0.002963 | 0.001481 |
|   | TC | 0.002963 | 0.002963 | 0.005926 | 0.004444 | 0.002963 | 0.007407 | 0.001481 | 0.002963 | 0.002963 | 0.008889 | 0.004444 | 0.001481 | 0.000000 | 0.002963 | 0.004444 | 0.005926 |
|   | TG | 0.007407 | 0.004444 | 0.002963 | 0.004444 | 0.007407 | 0.002963 | 0.005926 | 0.004444 | 0.000000 | 0.010370 | 0.007407 | 0.004444 | 0.002963 | 0.002963 | 0.005926 | 0.002963 |
|   | TT | 0.001481 | 0.002963 | 0.005926 | 0.002963 | 0.004444 | 0.005926 | 0.004444 | 0.004444 | 0.001481 | 0.005926 | 0.010370 | 0.004444 | 0.001481 | 0.004444 | 0.004444 | 0.002963 |
|   |    |          |          |          |          |          |          |          |          |          |          |          |          |          |          |          |          |
| G |    | AA       | AC       | AG       | AT       | CA       | CC       | CG       | CT       | GA       | GC       | GG       | GT       | TA       | TC       | TG       | TT       |
|   | AA | 0.005857 | 0.001464 | 0.001464 | 0.004392 | 0.004392 | 0.004392 | 0.004392 | 0.007321 | 0.005857 | 0.010249 | 0.008785 | 0.000000 | 0.004392 | 0.002928 | 0.007321 | 0.004392 |
|   | AC | 0.002928 | 0.004392 | 0.004392 | 0.002928 | 0.001464 | 0.002928 | 0.002928 | 0.007321 | 0.001464 | 0.002928 | 0.004392 | 0.004392 | 0.000000 | 0.001464 | 0.000000 | 0.005857 |
|   | AG | 0.004392 | 0.001464 | 0.001464 | 0.007321 | 0.004392 | 0.005857 | 0.011713 | 0.002928 | 0.002928 | 0.007321 | 0.004392 | 0.002928 | 0.002928 | 0.002928 | 0.001464 | 0.000000 |
|   | AT | 0.002928 | 0.002928 | 0.005857 | 0.002928 | 0.001464 | 0.005857 | 0.005857 | 0.002928 | 0.000000 | 0.002928 | 0.000000 | 0.002928 | 0.004392 | 0.000000 | 0.002928 | 0.002928 |
|   | CA | 0.007321 | 0.001464 | 0.005857 | 0.005857 | 0.008785 | 0.005857 | 0.004392 | 0.008785 | 0.007321 | 0.005857 | 0.005857 | 0.001464 | 0.001464 | 0.004392 | 0.007321 | 0.007321 |
|   | CC | 0.001464 | 0.004392 | 0.004392 | 0.001464 | 0.005857 | 0.004392 | 0.005857 | 0.010249 | 0.005857 | 0.004392 | 0.004392 | 0.004392 | 0.002928 | 0.002928 | 0.000000 | 0.001464 |
|   | CG | 0.005857 | 0.000000 | 0.001464 | 0.004392 | 0.002928 | 0.002928 | 0.004392 | 0.004392 | 0.008785 | 0.001464 | 0.005857 | 0.004392 | 0.005857 | 0.004392 | 0.010249 | 0.005857 |
|   | CT | 0.001464 | 0.010249 | 0.002928 | 0.001464 | 0.008785 | 0.002928 | 0.007321 | 0.001464 | 0.001464 | 0.007321 | 0.004392 | 0.004392 | 0.002928 | 0.005857 | 0.004392 | 0.005857 |
|   | GA | 0.002928 | 0.002928 | 0.002928 | 0.002928 | 0.007321 | 0.001464 | 0.005857 | 0.002928 | 0.001464 | 0.004392 | 0.001464 | 0.002928 | 0.004392 | 0.001464 | 0.002928 | 0.005857 |
|   | GC | 0.004392 | 0.002928 | 0.005857 | 0.004392 | 0.007321 | 0.004392 | 0.004392 | 0.008785 | 0.002928 | 0.004392 | 0.005857 | 0.010249 | 0.004392 | 0.002928 | 0.001464 | 0.008785 |
|   | GG | 0.007321 | 0.000000 | 0.004392 | 0.005857 | 0.000000 | 0.002928 | 0.007321 | 0.004392 | 0.004392 | 0.002928 | 0.001464 | 0.004392 | 0.002928 | 0.001464 | 0.005857 | 0.004392 |
|   | GT | 0.004392 | 0.001464 | 0.007321 | 0.001464 | 0.005857 | 0.005857 | 0.002928 | 0.005857 | 0.001464 | 0.004392 | 0.000000 | 0.005857 | 0.005857 | 0.002928 | 0.004392 | 0.002928 |
|   | TA | 0.002928 | 0.000000 | 0.002928 | 0.002928 | 0.002928 | 0.000000 | 0.001464 | 0.004392 | 0.000000 | 0.004392 | 0.001464 | 0.002928 | 0.000000 | 0.000000 | 0.001464 | 0.004392 |
|   | TC | 0.001464 | 0.002928 | 0.000000 | 0.001464 | 0.000000 | 0.004392 | 0.001464 | 0.005857 | 0.001464 | 0.002928 | 0.005857 | 0.007321 | 0.001464 | 0.004392 | 0.007321 | 0.007321 |
|   | TG | 0.004392 | 0.000000 | 0.000000 | 0.000000 | 0.002928 | 0.004392 | 0.007321 | 0.002928 | 0.001464 | 0.002928 | 0.001464 | 0.002928 | 0.007321 | 0.005857 | 0.004392 | 0.002928 |
|   | TT | 0.005857 | 0.000000 | 0.002928 | 0.002928 | 0.002928 | 0.005857 | 0.005857 | 0.004392 | 0.001464 | 0.002928 | 0.004392 | 0.007321 | 0.002928 | 0.004392 | 0.001464 | 0.005857 |
|   |    |          |          |          |          |          |          |          |          |          |          |          |          |          |          |          |          |
| T |    | AA       | AC       | AG       | AT       | CA       | CC       | CG       | CT       | GA       | GC       | GG       | GT       | TA       | TC       | TG       | TT       |
|   | AA | 0.004573 | 0.009146 | 0.006098 | 0.001524 | 0.006098 | 0.000000 | 0.003049 | 0.001524 | 0.006098 | 0.003049 | 0.000000 | 0.003049 | 0.001524 | 0.004573 | 0.004573 | 0.000000 |
|   | AC | 0.000000 | 0.003049 | 0.001524 | 0.004573 | 0.009146 | 0.001524 | 0.003049 | 0.004573 | 0.004573 | 0.003049 | 0.004573 | 0.003049 | 0.001524 | 0.000000 | 0.001524 | 0.004573 |
|   | AG | 0.004573 | 0.001524 | 0.001524 | 0.003049 | 0.004573 | 0.001524 | 0.001524 | 0.001524 | 0.003049 | 0.007622 | 0.004573 | 0.004573 | 0.006098 | 0.006098 | 0.007622 | 0.003049 |
|   | AT | 0.009146 | 0.003049 | 0.001524 | 0.006098 | 0.003049 | 0.001524 | 0.003049 | 0.003049 | 0.001524 | 0.003049 | 0.003049 | 0.006098 | 0.004573 | 0.003049 | 0.003049 | 0.001524 |
|   | CA | 0.003049 | 0.003049 | 0.006098 | 0.003049 | 0.006098 | 0.004573 | 0.001524 | 0.003049 | 0.006098 | 0.004573 | 0.003049 | 0.003049 | 0.006098 | 0.006098 | 0.003049 | 0.003049 |
|   | CC | 0.003049 | 0.000000 | 0.001524 | 0.003049 | 0.000000 | 0.003049 | 0.003049 | 0.003049 | 0.004573 | 0.004573 | 0.003049 | 0.006098 | 0.001524 | 0.004573 | 0.000000 | 0.007622 |
|   | CG | 0.006098 | 0.000000 | 0.000000 | 0.003049 | 0.004573 | 0.000000 | 0.003049 | 0.003049 | 0.000000 | 0.004573 | 0.003049 | 0.001524 | 0.001524 | 0.007622 | 0.007622 | 0.007622 |
|   | CT | 0.003049 | 0.006098 | 0.000000 | 0.003049 | 0.004573 | 0.004573 | 0.007622 | 0.000000 | 0.004573 | 0.003049 | 0.001524 | 0.001524 | 0.003049 | 0.007622 | 0.001524 | 0.007622 |
|   | GA | 0.004573 | 0.007622 | 0.000000 | 0.000000 | 0.001524 | 0.009146 | 0.003049 | 0.009146 | 0.001524 | 0.004573 | 0.000000 | 0.003049 | 0.006098 | 0.000000 | 0.001524 | 0.003049 |
|   | GC | 0.001524 | 0.004573 | 0.001524 | 0.001524 | 0.013720 | 0.010671 | 0.004573 | 0.007622 | 0.001524 | 0.010671 | 0.007622 | 0.006098 | 0.006098 | 0.003049 | 0.003049 | 0.004573 |

|   |              |          |                       |          |          |          |          |          |          |          |          |          |          |          |          |          |          |
|---|--------------|----------|-----------------------|----------|----------|----------|----------|----------|----------|----------|----------|----------|----------|----------|----------|----------|----------|
|   | GG           | 0.007622 | 0.001524              | 0.003049 | 0.007622 | 0.004573 | 0.003049 | 0.004573 | 0.003049 | 0.006098 | 0.004573 | 0.004573 | 0.007622 | 0.006098 | 0.003049 | 0.000000 | 0.004573 |
|   | GT           | 0.003049 | 0.004573              | 0.001524 | 0.007622 | 0.003049 | 0.004573 | 0.007622 | 0.003049 | 0.003049 | 0.009146 | 0.007622 | 0.006098 | 0.000000 | 0.006098 | 0.006098 | 0.006098 |
|   | TA           | 0.003049 | 0.000000              | 0.000000 | 0.003049 | 0.010671 | 0.006098 | 0.003049 | 0.004573 | 0.001524 | 0.004573 | 0.003049 | 0.001524 | 0.006098 | 0.000000 | 0.004573 | 0.006098 |
|   | TC           | 0.003049 | 0.001524              | 0.001524 | 0.003049 | 0.009146 | 0.003049 | 0.000000 | 0.001524 | 0.006098 | 0.003049 | 0.003049 | 0.004573 | 0.003049 | 0.009146 | 0.006098 | 0.003049 |
|   | TG           | 0.006098 | 0.001524              | 0.006098 | 0.003049 | 0.004573 | 0.001524 | 0.003049 | 0.004573 | 0.006098 | 0.004573 | 0.000000 | 0.003049 | 0.003049 | 0.001524 | 0.010671 | 0.003049 |
|   | TT           | 0.004573 | 0.001524              | 0.001524 | 0.004573 | 0.003049 | 0.009146 | 0.004573 | 0.007622 | 0.003049 | 0.004573 | 0.004573 | 0.001524 | 0.004573 | 0.007622 | 0.003049 | 0.007622 |
|   |              |          |                       |          |          |          |          |          |          |          |          |          |          |          |          |          |          |
|   | <b>puc18</b> |          | <b>reverse strand</b> |          |          |          |          |          |          |          |          |          |          |          |          |          |          |
|   |              |          |                       |          |          |          |          |          |          |          |          |          |          |          |          |          |          |
| A |              | AA       | AC                    | AG       | AT       | CA       | CC       | CG       | CT       | GA       | GC       | GG       | GT       | TA       | TC       | TG       | TT       |
|   | AA           | 0.007622 | 0.006098              | 0.007622 | 0.001524 | 0.003049 | 0.004573 | 0.007622 | 0.003049 | 0.003049 | 0.004573 | 0.007622 | 0.004573 | 0.006098 | 0.003049 | 0.003049 | 0.000000 |
|   | AC           | 0.001524 | 0.006098              | 0.001524 | 0.006098 | 0.003049 | 0.007622 | 0.001524 | 0.004573 | 0.004573 | 0.006098 | 0.006098 | 0.003049 | 0.001524 | 0.003049 | 0.003049 | 0.003049 |
|   | AG           | 0.007622 | 0.003049              | 0.000000 | 0.003049 | 0.004573 | 0.003049 | 0.003049 | 0.001524 | 0.001524 | 0.007622 | 0.003049 | 0.004573 | 0.004573 | 0.009146 | 0.003049 | 0.001524 |
|   | AT           | 0.004573 | 0.007622              | 0.003049 | 0.006098 | 0.003049 | 0.007622 | 0.003049 | 0.003049 | 0.003049 | 0.001524 | 0.003049 | 0.004573 | 0.003049 | 0.000000 | 0.003049 | 0.001524 |
|   | CA           | 0.003049 | 0.006098              | 0.001524 | 0.003049 | 0.010671 | 0.000000 | 0.007622 | 0.007622 | 0.006098 | 0.003049 | 0.000000 | 0.001524 | 0.004573 | 0.001524 | 0.003049 | 0.004573 |
|   | CC           | 0.004573 | 0.007622              | 0.001524 | 0.003049 | 0.000000 | 0.004573 | 0.003049 | 0.004573 | 0.003049 | 0.007622 | 0.003049 | 0.004573 | 0.003049 | 0.000000 | 0.003049 | 0.000000 |
|   | CG           | 0.004573 | 0.007622              | 0.007622 | 0.003049 | 0.003049 | 0.004573 | 0.003049 | 0.001524 | 0.000000 | 0.004573 | 0.003049 | 0.003049 | 0.003049 | 0.003049 | 0.001524 | 0.003049 |
|   | CT           | 0.001524 | 0.001524              | 0.000000 | 0.001524 | 0.006098 | 0.003049 | 0.000000 | 0.001524 | 0.001524 | 0.001524 | 0.001524 | 0.001524 | 0.000000 | 0.000000 | 0.006098 | 0.006098 |
|   | GA           | 0.007622 | 0.006098              | 0.007622 | 0.003049 | 0.001524 | 0.003049 | 0.007622 | 0.006098 | 0.009146 | 0.003049 | 0.004573 | 0.000000 | 0.000000 | 0.000000 | 0.006098 | 0.004573 |
|   | GC           | 0.004573 | 0.009146              | 0.003049 | 0.003049 | 0.004573 | 0.004573 | 0.004573 | 0.007622 | 0.003049 | 0.010671 | 0.004573 | 0.003049 | 0.004573 | 0.004573 | 0.004573 | 0.003049 |
|   | GG           | 0.009146 | 0.004573              | 0.004573 | 0.001524 | 0.001524 | 0.003049 | 0.000000 | 0.001524 | 0.003049 | 0.010671 | 0.003049 | 0.001524 | 0.006098 | 0.009146 | 0.004573 | 0.000000 |
|   | GT           | 0.001524 | 0.004573              | 0.006098 | 0.003049 | 0.001524 | 0.001524 | 0.000000 | 0.001524 | 0.001524 | 0.004573 | 0.000000 | 0.003049 | 0.000000 | 0.007622 | 0.003049 | 0.009146 |
|   | TA           | 0.004573 | 0.000000              | 0.003049 | 0.004573 | 0.003049 | 0.006098 | 0.001524 | 0.006098 | 0.003049 | 0.006098 | 0.001524 | 0.001524 | 0.006098 | 0.006098 | 0.006098 | 0.001524 |
|   | TC           | 0.003049 | 0.003049              | 0.004573 | 0.001524 | 0.006098 | 0.006098 | 0.000000 | 0.003049 | 0.006098 | 0.001524 | 0.004573 | 0.004573 | 0.001524 | 0.001524 | 0.006098 | 0.006098 |
|   | TG           | 0.003049 | 0.003049              | 0.004573 | 0.003049 | 0.004573 | 0.004573 | 0.004573 | 0.004573 | 0.009146 | 0.013720 | 0.000000 | 0.009146 | 0.010671 | 0.001524 | 0.006098 | 0.006098 |
|   | TT           | 0.004573 | 0.003049              | 0.003049 | 0.009146 | 0.006098 | 0.007622 | 0.006098 | 0.004573 | 0.003049 | 0.001524 | 0.003049 | 0.000000 | 0.003049 | 0.004573 | 0.003049 | 0.004573 |
|   |              |          |                       |          |          |          |          |          |          |          |          |          |          |          |          |          |          |
| C |              | AA       | AC                    | AG       | AT       | CA       | CC       | CG       | CT       | GA       | GC       | GG       | GT       | TA       | TC       | TG       | TT       |
|   | AA           | 0.005857 | 0.002928              | 0.005857 | 0.002928 | 0.002928 | 0.004392 | 0.005857 | 0.000000 | 0.007321 | 0.008785 | 0.001464 | 0.005857 | 0.004392 | 0.005857 | 0.007321 | 0.004392 |
|   | AC           | 0.007321 | 0.005857              | 0.004392 | 0.002928 | 0.002928 | 0.004392 | 0.004392 | 0.002928 | 0.007321 | 0.010249 | 0.004392 | 0.004392 | 0.002928 | 0.002928 | 0.001464 | 0.000000 |
|   | AG           | 0.004392 | 0.005857              | 0.001464 | 0.002928 | 0.002928 | 0.004392 | 0.004392 | 0.002928 | 0.005857 | 0.008785 | 0.010249 | 0.007321 | 0.004392 | 0.002928 | 0.008785 | 0.007321 |
|   | AT           | 0.002928 | 0.001464              | 0.001464 | 0.002928 | 0.000000 | 0.005857 | 0.004392 | 0.007321 | 0.001464 | 0.004392 | 0.001464 | 0.002928 | 0.002928 | 0.002928 | 0.005857 | 0.004392 |
|   | CA           | 0.001464 | 0.004392              | 0.004392 | 0.002928 | 0.004392 | 0.005857 | 0.010249 | 0.001464 | 0.007321 | 0.001464 | 0.000000 | 0.000000 | 0.001464 | 0.002928 | 0.007321 | 0.007321 |
|   | CC           | 0.004392 | 0.000000              | 0.004392 | 0.000000 | 0.001464 | 0.001464 | 0.005857 | 0.004392 | 0.005857 | 0.005857 | 0.004392 | 0.004392 | 0.001464 | 0.001464 | 0.005857 | 0.008785 |
|   | CG           | 0.005857 | 0.002928              | 0.007321 | 0.005857 | 0.007321 | 0.007321 | 0.004392 | 0.011713 | 0.001464 | 0.004392 | 0.005857 | 0.002928 | 0.001464 | 0.005857 | 0.004392 | 0.004392 |
|   | CT           | 0.002928 | 0.007321              | 0.002928 | 0.005857 | 0.000000 | 0.004392 | 0.001464 | 0.001464 | 0.000000 | 0.005857 | 0.004392 | 0.004392 | 0.002928 | 0.002928 | 0.005857 | 0.001464 |
|   | GA           | 0.004392 | 0.002928              | 0.005857 | 0.000000 | 0.005857 | 0.001464 | 0.004392 | 0.002928 | 0.004392 | 0.002928 | 0.002928 | 0.001464 | 0.000000 | 0.001464 | 0.004392 | 0.002928 |
|   | GC           | 0.002928 | 0.004392              | 0.007321 | 0.002928 | 0.002928 | 0.002928 | 0.001464 | 0.007321 | 0.002928 | 0.004392 | 0.004392 | 0.002928 | 0.004392 | 0.004392 | 0.005857 | 0.010249 |
|   | GG           | 0.005857 | 0.005857              | 0.002928 | 0.005857 | 0.004392 | 0.002928 | 0.002928 | 0.005857 | 0.004392 | 0.004392 | 0.004392 | 0.002928 | 0.000000 | 0.001464 | 0.005857 | 0.004392 |
|   | GT           | 0.000000 | 0.001464              | 0.010249 | 0.002928 | 0.000000 | 0.000000 | 0.000000 | 0.001464 | 0.002928 | 0.002928 | 0.004392 | 0.004392 | 0.000000 | 0.002928 | 0.001464 | 0.001464 |
|   | TA           | 0.002928 | 0.005857              | 0.002928 | 0.004392 | 0.007321 | 0.002928 | 0.005857 | 0.002928 | 0.001464 | 0.004392 | 0.002928 | 0.000000 | 0.000000 | 0.004392 | 0.001464 | 0.004392 |
|   | TC           | 0.001464 | 0.001464              | 0.001464 | 0.000000 | 0.001464 | 0.004392 | 0.008785 | 0.002928 | 0.001464 | 0.002928 | 0.005857 | 0.001464 | 0.000000 | 0.001464 | 0.007321 | 0.005857 |
|   | TG           | 0.002928 | 0.005857              | 0.008785 | 0.001464 | 0.002928 | 0.000000 | 0.002928 | 0.004392 | 0.000000 | 0.007321 | 0.005857 | 0.001464 | 0.002928 | 0.007321 | 0.008785 | 0.004392 |
|   | TT           | 0.005857 | 0.004392              | 0.001464 | 0.002928 | 0.004392 | 0.007321 | 0.005857 | 0.004392 | 0.001464 | 0.004392 | 0.001464 | 0.002928 | 0.002928 | 0.002928 | 0.007321 | 0.005857 |
|   |              |          |                       |          |          |          |          |          |          |          |          |          |          |          |          |          |          |
| G |              | AA       | AC                    | AG       | AT       | CA       | CC       | CG       | CT       | GA       | GC       | GG       | GT       | TA       | TC       | TG       | TT       |
|   | AA           | 0.002963 | 0.001481              | 0.008889 | 0.007407 | 0.002963 | 0.004444 | 0.005926 | 0.002963 | 0.005926 | 0.002963 | 0.002963 | 0.001481 | 0.001481 | 0.001481 | 0.000000 | 0.004444 |
|   | AC           | 0.004444 | 0.007407              | 0.004444 | 0.004444 | 0.004444 | 0.005926 | 0.004444 | 0.002963 | 0.001481 | 0.000000 | 0.004444 | 0.001481 | 0.000000 | 0.002963 | 0.001481 | 0.002963 |
|   | AG           | 0.004444 | 0.002963              | 0.002963 | 0.002963 | 0.004444 | 0.002963 | 0.004444 | 0.001481 | 0.002963 | 0.001481 | 0.002963 | 0.001481 | 0.002963 | 0.000000 | 0.004444 | 0.004444 |
|   | AT           | 0.002963 | 0.005926              | 0.005926 | 0.004444 | 0.004444 | 0.002963 | 0.001481 | 0.005926 | 0.004444 | 0.005926 | 0.001481 | 0.004444 | 0.002963 | 0.001481 | 0.005926 | 0.002963 |
|   | CA           | 0.004444 | 0.004444              | 0.002963 | 0.004444 | 0.005926 | 0.005926 | 0.007407 | 0.005926 | 0.004444 | 0.004444 | 0.004444 | 0.004444 | 0.002963 | 0.001481 | 0.007407 | 0.002963 |
|   | CC           | 0.010370 | 0.002963              | 0.001481 | 0.002963 | 0.007407 | 0.005926 | 0.001481 | 0.008889 | 0.004444 | 0.005926 | 0.005926 | 0.002963 | 0.007407 | 0.004444 | 0.001481 | 0.000000 |
|   | CG           | 0.004444 | 0.001481              | 0.004444 | 0.007407 | 0.005926 | 0.004444 | 0.000000 | 0.002963 | 0.001481 | 0.005926 | 0.005926 | 0.002963 | 0.010370 | 0.002963 | 0.002963 | 0.001481 |
|   | CT           | 0.005926 | 0.005926              | 0.004444 | 0.010370 | 0.002963 | 0.002963 | 0.005926 | 0.010370 | 0.005926 | 0.013333 | 0.002963 | 0.004444 | 0.002963 | 0.002963 | 0.004444 | 0.004444 |



|   |                             |          |          |                       |          |          |          |          |          |          |          |          |          |          |          |          |          |  |
|---|-----------------------------|----------|----------|-----------------------|----------|----------|----------|----------|----------|----------|----------|----------|----------|----------|----------|----------|----------|--|
|   | GA                          | 0.004444 | 0.001481 | 0.002963              | 0.004444 | 0.002963 | 0.002963 | 0.017778 | 0.011852 | 0.002963 | 0.002963 | 0.001481 | 0.001481 | 0.004444 | 0.004444 | 0.004444 | 0.004444 |  |
|   | GC                          | 0.005926 | 0.000000 | 0.002963              | 0.001481 | 0.010370 | 0.005926 | 0.007407 | 0.001481 | 0.008889 | 0.005926 | 0.001481 | 0.010370 | 0.002963 | 0.002963 | 0.004444 | 0.004444 |  |
|   | GG                          | 0.005926 | 0.000000 | 0.005926              | 0.002963 | 0.002963 | 0.002963 | 0.001481 | 0.002963 | 0.007407 | 0.002963 | 0.008889 | 0.001481 | 0.000000 | 0.002963 | 0.001481 | 0.005926 |  |
|   | GT                          | 0.002963 | 0.004444 | 0.011852              | 0.004444 | 0.004444 | 0.001481 | 0.002963 | 0.001481 | 0.002963 | 0.002963 | 0.005926 | 0.002963 | 0.001481 | 0.004444 | 0.001481 | 0.000000 |  |
|   | TA                          | 0.001481 | 0.004444 | 0.001481              | 0.001481 | 0.002963 | 0.001481 | 0.001481 | 0.002963 | 0.000000 | 0.002963 | 0.000000 | 0.004444 | 0.000000 | 0.001481 | 0.001481 | 0.005926 |  |
|   | TC                          | 0.001481 | 0.001481 | 0.001481              | 0.001481 | 0.000000 | 0.013333 | 0.001481 | 0.002963 | 0.002963 | 0.001481 | 0.004444 | 0.002963 | 0.002963 | 0.001481 | 0.005926 | 0.004444 |  |
|   | TG                          | 0.004444 | 0.001481 | 0.004444              | 0.005926 | 0.007407 | 0.005926 | 0.010370 | 0.004444 | 0.002963 | 0.000000 | 0.002963 | 0.004444 | 0.004444 | 0.000000 | 0.002963 | 0.005926 |  |
|   | TT                          | 0.001481 | 0.001481 | 0.008889              | 0.004444 | 0.007407 | 0.002963 | 0.004444 | 0.005926 | 0.002963 | 0.002963 | 0.002963 | 0.002963 | 0.000000 | 0.001481 | 0.004444 | 0.002963 |  |
|   |                             |          |          |                       |          |          |          |          |          |          |          |          |          |          |          |          |          |  |
| T |                             | AA       | AC       | AG                    | AT       | CA       | CC       | CG       | CT       | GA       | GC       | GG       | GT       | TA       | TC       | TG       | TT       |  |
|   | AA                          | 0.004491 | 0.004491 | 0.004491              | 0.002994 | 0.000000 | 0.002994 | 0.001497 | 0.005988 | 0.004491 | 0.002994 | 0.005988 | 0.004491 | 0.004491 | 0.001497 | 0.001497 | 0.002994 |  |
|   | AC                          | 0.000000 | 0.001497 | 0.000000              | 0.004491 | 0.005988 | 0.000000 | 0.002994 | 0.005988 | 0.004491 | 0.001497 | 0.011976 | 0.002994 | 0.004491 | 0.005988 | 0.002994 | 0.005988 |  |
|   | AG                          | 0.002994 | 0.002994 | 0.000000              | 0.002994 | 0.004491 | 0.001497 | 0.002994 | 0.000000 | 0.005988 | 0.001497 | 0.004491 | 0.001497 | 0.007485 | 0.001497 | 0.004491 | 0.004491 |  |
|   | AT                          | 0.007485 | 0.002994 | 0.001497              | 0.002994 | 0.004491 | 0.001497 | 0.001497 | 0.002994 | 0.004491 | 0.002994 | 0.001497 | 0.001497 | 0.002994 | 0.004491 | 0.001497 | 0.008982 |  |
|   | CA                          | 0.001497 | 0.004491 | 0.001497              | 0.002994 | 0.001497 | 0.002994 | 0.001497 | 0.002994 | 0.008982 | 0.001497 | 0.001497 | 0.004491 | 0.002994 | 0.001497 | 0.002994 | 0.004491 |  |
|   | CC                          | 0.000000 | 0.004491 | 0.000000              | 0.004491 | 0.001497 | 0.001497 | 0.002994 | 0.004491 | 0.007485 | 0.002994 | 0.004491 | 0.005988 | 0.004491 | 0.004491 | 0.004491 | 0.011976 |  |
|   | CG                          | 0.002994 | 0.000000 | 0.004491              | 0.005988 | 0.005988 | 0.000000 | 0.004491 | 0.001497 | 0.007485 | 0.001497 | 0.001497 | 0.002994 | 0.002994 | 0.001497 | 0.004491 | 0.002994 |  |
|   | CT                          | 0.002994 | 0.008982 | 0.001497              | 0.001497 | 0.005988 | 0.010479 | 0.000000 | 0.005988 | 0.005988 | 0.002994 | 0.004491 | 0.001497 | 0.005988 | 0.002994 | 0.002994 | 0.014970 |  |
|   | GA                          | 0.014970 | 0.005988 | 0.002994              | 0.000000 | 0.005988 | 0.005988 | 0.005988 | 0.004491 | 0.002994 | 0.007485 | 0.004491 | 0.000000 | 0.002994 | 0.002994 | 0.001497 | 0.002994 |  |
|   | GC                          | 0.002994 | 0.002994 | 0.000000              | 0.002994 | 0.005988 | 0.001497 | 0.007485 | 0.002994 | 0.010479 | 0.007485 | 0.008982 | 0.001497 | 0.001497 | 0.008982 | 0.005988 | 0.004491 |  |
|   | GG                          | 0.007485 | 0.001497 | 0.000000              | 0.008982 | 0.000000 | 0.000000 | 0.004491 | 0.001497 | 0.004491 | 0.004491 | 0.002994 | 0.000000 | 0.002994 | 0.002994 | 0.002994 | 0.008982 |  |
|   | GT                          | 0.002994 | 0.005988 | 0.002994              | 0.002994 | 0.000000 | 0.002994 | 0.001497 | 0.004491 | 0.001497 | 0.004491 | 0.005988 | 0.001497 | 0.004491 | 0.004491 | 0.002994 | 0.008982 |  |
|   | TA                          | 0.000000 | 0.001497 | 0.002994              | 0.001497 | 0.001497 | 0.005988 | 0.001497 | 0.002994 | 0.002994 | 0.002994 | 0.004491 | 0.004491 | 0.004491 | 0.004491 | 0.004491 | 0.007485 |  |
|   | TC                          | 0.001497 | 0.001497 | 0.005988              | 0.000000 | 0.005988 | 0.004491 | 0.001497 | 0.000000 | 0.004491 | 0.010479 | 0.001497 | 0.004491 | 0.004491 | 0.002994 | 0.001497 | 0.004491 |  |
|   | TG                          | 0.001497 | 0.000000 | 0.004491              | 0.001497 | 0.004491 | 0.000000 | 0.002994 | 0.002994 | 0.005988 | 0.002994 | 0.004491 | 0.002994 | 0.001497 | 0.002994 | 0.001497 | 0.004491 |  |
|   | TT                          | 0.005988 | 0.005988 | 0.001497              | 0.007485 | 0.004491 | 0.007485 | 0.007485 | 0.005988 | 0.004491 | 0.010479 | 0.000000 | 0.004491 | 0.007485 | 0.013473 | 0.011976 | 0.022455 |  |
|   | <b>calf thymus (bovine)</b> |          |          | <b>forward strand</b> |          |          |          |          |          |          |          |          |          |          |          |          |          |  |
|   |                             |          |          |                       |          |          |          |          |          |          |          |          |          |          |          |          |          |  |
| A |                             | AA       | AC       | AG                    | AT       | CA       | CC       | CG       | CT       | GA       | GC       | GG       | GT       | TA       | TC       | TG       | TT       |  |
|   | AA                          | 0.016554 | 0.006576 | 0.008885              | 0.011585 | 0.007399 | 0.003761 | 0.000827 | 0.005961 | 0.009925 | 0.004970 | 0.005473 | 0.006445 | 0.009906 | 0.005119 | 0.007651 | 0.008323 |  |
|   | AC                          | 0.006753 | 0.003025 | 0.003465              | 0.003975 | 0.006140 | 0.002603 | 0.001137 | 0.003615 | 0.006248 | 0.003474 | 0.003901 | 0.004761 | 0.004134 | 0.003336 | 0.004405 | 0.005126 |  |
|   | AG                          | 0.010640 | 0.003861 | 0.006738              | 0.006749 | 0.005103 | 0.002759 | 0.000841 | 0.004060 | 0.006847 | 0.003340 | 0.005202 | 0.005311 | 0.004169 | 0.003363 | 0.005343 | 0.004552 |  |
|   | AT                          | 0.008385 | 0.002824 | 0.003546              | 0.005479 | 0.005015 | 0.002118 | 0.000459 | 0.003722 | 0.004078 | 0.002407 | 0.002271 | 0.003137 | 0.007178 | 0.003212 | 0.004388 | 0.007337 |  |
|   | CA                          | 0.007490 | 0.003767 | 0.006203              | 0.005634 | 0.004453 | 0.002968 | 0.000456 | 0.003973 | 0.005143 | 0.002504 | 0.004002 | 0.003195 | 0.003978 | 0.002566 | 0.003878 | 0.003853 |  |
|   | CC                          | 0.005274 | 0.003427 | 0.003859              | 0.003127 | 0.004395 | 0.003932 | 0.000937 | 0.004240 | 0.004709 | 0.003904 | 0.006591 | 0.004487 | 0.003156 | 0.004383 | 0.005248 | 0.004548 |  |
|   | CG                          | 0.000580 | 0.000465 | 0.000695              | 0.000436 | 0.000530 | 0.000686 | 0.000122 | 0.001330 | 0.000624 | 0.000483 | 0.000727 | 0.000570 | 0.000328 | 0.000399 | 0.000631 | 0.000493 |  |
|   | CT                          | 0.004390 | 0.002015 | 0.002921              | 0.002954 | 0.002873 | 0.001898 | 0.000330 | 0.002730 | 0.003162 | 0.001534 | 0.002215 | 0.002302 | 0.002999 | 0.001986 | 0.002927 | 0.003970 |  |
|   | GA                          | 0.009768 | 0.004129 | 0.006322              | 0.006880 | 0.004034 | 0.002485 | 0.000486 | 0.004052 | 0.006303 | 0.003709 | 0.004763 | 0.003896 | 0.004344 | 0.003335 | 0.004211 | 0.004815 |  |
|   | GC                          | 0.004813 | 0.002538 | 0.003344              | 0.002873 | 0.003203 | 0.001856 | 0.000680 | 0.002474 | 0.004551 | 0.003647 | 0.004158 | 0.003307 | 0.002502 | 0.003066 | 0.002885 | 0.003633 |  |
|   | GG                          | 0.007610 | 0.002701 | 0.005502              | 0.004045 | 0.004033 | 0.002006 | 0.000760 | 0.003719 | 0.006168 | 0.003048 | 0.004697 | 0.003511 | 0.002274 | 0.002431 | 0.003672 | 0.003681 |  |
|   | GT                          | 0.004156 | 0.001706 | 0.002309              | 0.002781 | 0.002497 | 0.001247 | 0.000284 | 0.002299 | 0.002326 | 0.001676 | 0.001910 | 0.001922 | 0.003036 | 0.001838 | 0.002520 | 0.003905 |  |
|   | TA                          | 0.009839 | 0.003470 | 0.005442              | 0.006926 | 0.003776 | 0.002014 | 0.000375 | 0.003417 | 0.004257 | 0.002290 | 0.002678 | 0.003471 | 0.004970 | 0.002649 | 0.003728 | 0.005706 |  |
|   | TC                          | 0.006268 | 0.002823 | 0.004082              | 0.004231 | 0.004945 | 0.003234 | 0.000781 | 0.005387 | 0.005608 | 0.003804 | 0.004337 | 0.006091 | 0.003736 | 0.003946 | 0.004810 | 0.006037 |  |
|   | TG                          | 0.008327 | 0.004017 | 0.005762              | 0.005461 | 0.003950 | 0.003113 | 0.000528 | 0.005072 | 0.005219 | 0.003594 | 0.003897 | 0.004405 | 0.003573 | 0.003082 | 0.005119 | 0.004955 |  |
|   | TT                          | 0.008772 | 0.003016 | 0.003876              | 0.005770 | 0.004033 | 0.002424 | 0.000376 | 0.004131 | 0.003900 | 0.002386 | 0.002679 | 0.003353 | 0.005206 | 0.003322 | 0.003782 | 0.007971 |  |
|   |                             |          |          |                       |          |          |          |          |          |          |          |          |          |          |          |          |          |  |
| C |                             | AA       | AC       | AG                    | AT       | CA       | CC       | CG       | CT       | GA       | GC       | GG       | GT       | TA       | TC       | TG       | TT       |  |
|   | AA                          | 0.008416 | 0.005330 | 0.006809              | 0.006916 | 0.005946 | 0.004439 | 0.000612 | 0.004720 | 0.000828 | 0.000609 | 0.000662 | 0.000894 | 0.005042 | 0.005806 | 0.007038 | 0.006400 |  |
|   | AC                          | 0.004845 | 0.004599 | 0.005837              | 0.005041 | 0.005707 | 0.004064 | 0.000747 | 0.004196 | 0.000704 | 0.000580 | 0.000578 | 0.000707 | 0.003360 | 0.003988 | 0.005244 | 0.004511 |  |
|   | AG                          | 0.006828 | 0.004337 | 0.007158              | 0.006085 | 0.005999 | 0.004727 | 0.000797 | 0.006078 | 0.001107 | 0.000686 | 0.000807 | 0.000859 | 0.003614 | 0.004365 | 0.006071 | 0.005684 |  |
|   | AT                          | 0.006427 | 0.005174 | 0.005945              | 0.005946 | 0.005939 | 0.005114 | 0.000597 | 0.005256 | 0.000777 | 0.000557 | 0.000468 | 0.000644 | 0.004626 | 0.005768 | 0.006417 | 0.007634 |  |
|   | CA                          | 0.005969 | 0.006131 | 0.007892              | 0.006088 | 0.006159 | 0.004195 | 0.000916 | 0.004986 | 0.001283 | 0.001016 | 0.001209 | 0.001400 | 0.003323 | 0.005006 | 0.007161 | 0.006460 |  |

|   |                      |          |          |                |          |          |          |          |          |          |          |          |          |          |          |          |          |
|---|----------------------|----------|----------|----------------|----------|----------|----------|----------|----------|----------|----------|----------|----------|----------|----------|----------|----------|
|   | CC                   | 0.005059 | 0.005719 | 0.007736       | 0.005888 | 0.006719 | 0.003860 | 0.001403 | 0.004915 | 0.000821 | 0.001145 | 0.001313 | 0.000943 | 0.002737 | 0.005160 | 0.007423 | 0.005449 |
|   | CG                   | 0.000712 | 0.000754 | 0.001130       | 0.000720 | 0.001000 | 0.000987 | 0.000384 | 0.000932 | 0.000178 | 0.000319 | 0.000361 | 0.000220 | 0.000490 | 0.001045 | 0.001180 | 0.000923 |
|   | CT                   | 0.005794 | 0.004478 | 0.007802       | 0.005847 | 0.008677 | 0.006117 | 0.001130 | 0.008461 | 0.000764 | 0.000649 | 0.000951 | 0.000760 | 0.004408 | 0.006469 | 0.008968 | 0.009052 |
|   | GA                   | 0.004354 | 0.004067 | 0.005694       | 0.004867 | 0.003882 | 0.003760 | 0.000583 | 0.003765 | 0.000694 | 0.000632 | 0.001013 | 0.000794 | 0.003060 | 0.004936 | 0.006740 | 0.005024 |
|   | GC                   | 0.004319 | 0.003844 | 0.004835       | 0.004938 | 0.004389 | 0.003485 | 0.000939 | 0.003844 | 0.000577 | 0.000763 | 0.000835 | 0.000745 | 0.002217 | 0.004004 | 0.006218 | 0.004722 |
|   | GG                   | 0.005440 | 0.002855 | 0.005990       | 0.003926 | 0.004184 | 0.002904 | 0.000836 | 0.003771 | 0.000596 | 0.000681 | 0.001170 | 0.000706 | 0.002742 | 0.004423 | 0.005677 | 0.004752 |
|   | GT                   | 0.004066 | 0.003911 | 0.005065       | 0.004724 | 0.005993 | 0.003567 | 0.000950 | 0.004196 | 0.000421 | 0.001108 | 0.000990 | 0.001078 | 0.002871 | 0.004284 | 0.005065 | 0.005623 |
|   | TA                   | 0.005339 | 0.003386 | 0.005408       | 0.005959 | 0.004319 | 0.002340 | 0.000446 | 0.003624 | 0.000507 | 0.000319 | 0.000469 | 0.000726 | 0.003421 | 0.003543 | 0.005206 | 0.005795 |
|   | TC                   | 0.007732 | 0.004738 | 0.009206       | 0.008461 | 0.007662 | 0.005484 | 0.001135 | 0.007842 | 0.000974 | 0.000650 | 0.000810 | 0.000988 | 0.004231 | 0.007077 | 0.007704 | 0.008910 |
|   | TG                   | 0.006004 | 0.003517 | 0.007708       | 0.006183 | 0.006804 | 0.004064 | 0.000905 | 0.006446 | 0.000976 | 0.000499 | 0.000815 | 0.000806 | 0.004240 | 0.004775 | 0.007923 | 0.007421 |
|   | TT                   | 0.008009 | 0.006560 | 0.008965       | 0.009396 | 0.009635 | 0.007366 | 0.000749 | 0.010036 | 0.000750 | 0.000546 | 0.000658 | 0.000834 | 0.006769 | 0.009777 | 0.009148 | 0.013395 |
|   |                      |          |          |                |          |          |          |          |          |          |          |          |          |          |          |          |          |
| G |                      | AA       | AC       | AG             | AT       | CA       | CC       | CG       | CT       | GA       | GC       | GG       | GT       | TA       | TC       | TG       | TT       |
|   | AA                   | 0.013416 | 0.005629 | 0.009087       | 0.007583 | 0.007457 | 0.004769 | 0.000863 | 0.005693 | 0.008905 | 0.004738 | 0.005435 | 0.004481 | 0.005769 | 0.005049 | 0.006483 | 0.006405 |
|   | AC                   | 0.000917 | 0.001112 | 0.000832       | 0.000679 | 0.000856 | 0.000734 | 0.000216 | 0.000889 | 0.001037 | 0.000764 | 0.000966 | 0.000730 | 0.000757 | 0.000828 | 0.001453 | 0.000935 |
|   | AG                   | 0.010005 | 0.004216 | 0.008435       | 0.005241 | 0.006448 | 0.003752 | 0.000876 | 0.006070 | 0.007817 | 0.003821 | 0.004901 | 0.004167 | 0.003590 | 0.003768 | 0.004961 | 0.004697 |
|   | AT                   | 0.009410 | 0.004703 | 0.005844       | 0.005900 | 0.006184 | 0.003925 | 0.000662 | 0.006072 | 0.008447 | 0.004917 | 0.005879 | 0.004998 | 0.005931 | 0.004845 | 0.006072 | 0.006865 |
|   | CA                   | 0.009078 | 0.005030 | 0.008930       | 0.006335 | 0.007866 | 0.005620 | 0.001110 | 0.006014 | 0.007651 | 0.006209 | 0.007387 | 0.005179 | 0.005146 | 0.006683 | 0.007119 | 0.006948 |
|   | CC                   | 0.000709 | 0.001029 | 0.001000       | 0.000499 | 0.000871 | 0.001212 | 0.000361 | 0.000840 | 0.000874 | 0.000903 | 0.001389 | 0.000625 | 0.000504 | 0.001061 | 0.001272 | 0.000689 |
|   | CG                   | 0.000813 | 0.000982 | 0.001211       | 0.000634 | 0.000958 | 0.000868 | 0.000381 | 0.000855 | 0.001206 | 0.000977 | 0.001439 | 0.000789 | 0.000471 | 0.000621 | 0.000966 | 0.000650 |
|   | CT                   | 0.008921 | 0.005004 | 0.007720       | 0.005857 | 0.007685 | 0.005965 | 0.001050 | 0.007092 | 0.009193 | 0.004803 | 0.007688 | 0.005775 | 0.005353 | 0.005658 | 0.007840 | 0.006693 |
|   | GA                   | 0.009786 | 0.004280 | 0.006438       | 0.005755 | 0.004781 | 0.004456 | 0.001001 | 0.004361 | 0.007105 | 0.004026 | 0.005148 | 0.003972 | 0.003514 | 0.004929 | 0.004981 | 0.005768 |
|   | GC                   | 0.000595 | 0.001125 | 0.000698       | 0.000584 | 0.000558 | 0.000710 | 0.000321 | 0.000735 | 0.000707 | 0.000794 | 0.001196 | 0.000605 | 0.000341 | 0.000664 | 0.001074 | 0.000632 |
|   | GG                   | 0.007351 | 0.003549 | 0.006077       | 0.005085 | 0.004056 | 0.002916 | 0.000936 | 0.004721 | 0.005484 | 0.003486 | 0.003862 | 0.004062 | 0.002317 | 0.003745 | 0.004176 | 0.004397 |
|   | GT                   | 0.006540 | 0.003890 | 0.004455       | 0.005140 | 0.003525 | 0.002860 | 0.000716 | 0.004360 | 0.004755 | 0.003838 | 0.005733 | 0.004562 | 0.003356 | 0.004038 | 0.006146 | 0.005274 |
|   | TA                   | 0.006805 | 0.002885 | 0.004435       | 0.004627 | 0.004284 | 0.002766 | 0.000469 | 0.003623 | 0.004265 | 0.002239 | 0.002764 | 0.003379 | 0.003418 | 0.003109 | 0.003359 | 0.005063 |
|   | TC                   | 0.000817 | 0.000471 | 0.000818       | 0.000821 | 0.001030 | 0.000638 | 0.000178 | 0.001159 | 0.001023 | 0.000603 | 0.000864 | 0.000738 | 0.000548 | 0.000758 | 0.001352 | 0.000885 |
|   | TG                   | 0.009556 | 0.005974 | 0.008621       | 0.005859 | 0.006759 | 0.004172 | 0.000951 | 0.005961 | 0.007596 | 0.004369 | 0.006689 | 0.005635 | 0.004267 | 0.003859 | 0.006146 | 0.005902 |
|   | TT                   | 0.008020 | 0.004061 | 0.005801       | 0.006403 | 0.006016 | 0.005477 | 0.000668 | 0.006814 | 0.007721 | 0.004337 | 0.005066 | 0.004824 | 0.005329 | 0.004373 | 0.005994 | 0.008397 |
|   |                      |          |          |                |          |          |          |          |          |          |          |          |          |          |          |          |          |
| T |                      | AA       | AC       | AG             | AT       | CA       | CC       | CG       | CT       | GA       | GC       | GG       | GT       | TA       | TC       | TG       | TT       |
|   | AA                   | 0.007948 | 0.003916 | 0.003973       | 0.007368 | 0.004990 | 0.003701 | 0.000462 | 0.004577 | 0.006077 | 0.003651 | 0.004607 | 0.005163 | 0.005705 | 0.004838 | 0.003859 | 0.008345 |
|   | AC                   | 0.003314 | 0.001917 | 0.002279       | 0.003135 | 0.004402 | 0.003533 | 0.000533 | 0.005320 | 0.006064 | 0.003326 | 0.004497 | 0.004770 | 0.003436 | 0.003903 | 0.003162 | 0.006457 |
|   | AG                   | 0.004102 | 0.002284 | 0.002704       | 0.003699 | 0.005084 | 0.003727 | 0.001294 | 0.004049 | 0.005413 | 0.002465 | 0.004263 | 0.003604 | 0.003389 | 0.004052 | 0.003955 | 0.005944 |
|   | AT                   | 0.005764 | 0.002791 | 0.002957       | 0.005510 | 0.005496 | 0.004081 | 0.000397 | 0.006785 | 0.004252 | 0.002912 | 0.003165 | 0.004018 | 0.006905 | 0.006904 | 0.005648 | 0.011587 |
|   | CA                   | 0.003748 | 0.002496 | 0.002906       | 0.004381 | 0.005111 | 0.003687 | 0.000594 | 0.005346 | 0.004796 | 0.002881 | 0.005268 | 0.004414 | 0.003683 | 0.004197 | 0.003848 | 0.007643 |
|   | CC                   | 0.002644 | 0.001891 | 0.002194       | 0.002254 | 0.003905 | 0.004700 | 0.000683 | 0.005205 | 0.004311 | 0.004162 | 0.006627 | 0.003915 | 0.002651 | 0.004774 | 0.003981 | 0.005476 |
|   | CG                   | 0.000402 | 0.000299 | 0.000349       | 0.000489 | 0.000561 | 0.000802 | 0.000128 | 0.000877 | 0.000822 | 0.000702 | 0.000977 | 0.001176 | 0.000392 | 0.000515 | 0.000480 | 0.000866 |
|   | CT                   | 0.003852 | 0.002299 | 0.002909       | 0.003535 | 0.005769 | 0.005495 | 0.000649 | 0.006758 | 0.004095 | 0.003361 | 0.003891 | 0.003488 | 0.005421 | 0.006310 | 0.006203 | 0.008895 |
|   | GA                   | 0.003303 | 0.001848 | 0.001981       | 0.003233 | 0.003122 | 0.002433 | 0.000391 | 0.003395 | 0.003969 | 0.003061 | 0.004406 | 0.003336 | 0.002648 | 0.003358 | 0.002594 | 0.005141 |
|   | GC                   | 0.002356 | 0.001672 | 0.001500       | 0.002402 | 0.003605 | 0.003071 | 0.000448 | 0.003347 | 0.003803 | 0.003668 | 0.003935 | 0.003482 | 0.002262 | 0.003719 | 0.002492 | 0.004979 |
|   | GG                   | 0.002404 | 0.001239 | 0.001887       | 0.002102 | 0.003146 | 0.002016 | 0.000682 | 0.002783 | 0.003256 | 0.001849 | 0.003955 | 0.002614 | 0.002003 | 0.002497 | 0.002980 | 0.003773 |
|   | GT                   | 0.002996 | 0.001700 | 0.002006       | 0.002828 | 0.004036 | 0.002738 | 0.000437 | 0.003883 | 0.002821 | 0.002549 | 0.003448 | 0.003043 | 0.003453 | 0.004153 | 0.003783 | 0.006593 |
|   | TA                   | 0.005162 | 0.003036 | 0.002993       | 0.007177 | 0.003587 | 0.002293 | 0.000307 | 0.004193 | 0.003741 | 0.002518 | 0.003198 | 0.004165 | 0.004919 | 0.004351 | 0.003979 | 0.009942 |
|   | TC                   | 0.003875 | 0.002306 | 0.003130       | 0.004050 | 0.005192 | 0.006202 | 0.000571 | 0.006848 | 0.005610 | 0.004561 | 0.004728 | 0.006254 | 0.004204 | 0.006300 | 0.005106 | 0.009954 |
|   | TG                   | 0.003991 | 0.002469 | 0.002848       | 0.004990 | 0.003939 | 0.004029 | 0.000486 | 0.005095 | 0.004942 | 0.003203 | 0.004387 | 0.006153 | 0.003727 | 0.004017 | 0.004410 | 0.007393 |
|   | TT                   | 0.008717 | 0.004120 | 0.004351       | 0.008335 | 0.008314 | 0.007619 | 0.000518 | 0.010621 | 0.006253 | 0.004818 | 0.005278 | 0.006760 | 0.009772 | 0.009759 | 0.007493 | 0.016564 |
|   |                      |          |          |                |          |          |          |          |          |          |          |          |          |          |          |          |          |
|   | calf thymus (bovine) |          |          | reverse strand |          |          |          |          |          |          |          |          |          |          |          |          |          |
|   |                      |          |          |                |          |          |          |          |          |          |          |          |          |          |          |          |          |
| A |                      | AA       | AC       | AG             | AT       | CA       | CC       | CG       | CT       | GA       | GC       | GG       | GT       | TA       | TC       | TG       | TT       |
|   | AA                   | 0.016564 | 0.006593 | 0.008895       | 0.011587 | 0.007393 | 0.003773 | 0.000866 | 0.005944 | 0.009954 | 0.004979 | 0.005476 | 0.006457 | 0.009942 | 0.005141 | 0.007643 | 0.008345 |
|   | AC                   | 0.006760 | 0.003043 | 0.003488       | 0.004018 | 0.006153 | 0.002614 | 0.001176 | 0.003604 | 0.006254 | 0.003482 | 0.003915 | 0.004770 | 0.004165 | 0.003336 | 0.004414 | 0.005163 |
|   | AG                   | 0.010621 | 0.003883 | 0.006758       | 0.006785 | 0.005095 | 0.002783 | 0.000877 | 0.004049 | 0.006848 | 0.003347 | 0.005205 | 0.005320 | 0.004193 | 0.003395 | 0.005346 | 0.004577 |

|   |    |          |          |          |          |          |          |          |          |          |          |          |          |          |          |          |          |
|---|----|----------|----------|----------|----------|----------|----------|----------|----------|----------|----------|----------|----------|----------|----------|----------|----------|
|   | AT | 0.008335 | 0.002828 | 0.003535 | 0.005510 | 0.004990 | 0.002102 | 0.000489 | 0.003699 | 0.004050 | 0.002402 | 0.002254 | 0.003135 | 0.007177 | 0.003233 | 0.004381 | 0.007368 |
|   | CA | 0.007493 | 0.003783 | 0.006203 | 0.005648 | 0.004410 | 0.002980 | 0.000480 | 0.003955 | 0.005106 | 0.002492 | 0.003981 | 0.003162 | 0.003979 | 0.002594 | 0.003848 | 0.003859 |
|   | CC | 0.005278 | 0.003448 | 0.003891 | 0.003165 | 0.004387 | 0.003955 | 0.000977 | 0.004263 | 0.004728 | 0.003935 | 0.006627 | 0.004497 | 0.003198 | 0.004406 | 0.005268 | 0.004607 |
|   | CG | 0.000518 | 0.000437 | 0.000649 | 0.000397 | 0.000486 | 0.000682 | 0.000128 | 0.001294 | 0.000571 | 0.000448 | 0.000683 | 0.000533 | 0.000307 | 0.000391 | 0.000594 | 0.000462 |
|   | CT | 0.004351 | 0.002006 | 0.002909 | 0.002957 | 0.002848 | 0.001887 | 0.000349 | 0.002704 | 0.003130 | 0.001500 | 0.002194 | 0.002279 | 0.002993 | 0.001981 | 0.002906 | 0.003973 |
|   | GA | 0.009759 | 0.004153 | 0.006310 | 0.006904 | 0.004017 | 0.002497 | 0.000515 | 0.004052 | 0.006300 | 0.003719 | 0.004774 | 0.003903 | 0.004351 | 0.003358 | 0.004197 | 0.004838 |
|   | GC | 0.004818 | 0.002549 | 0.003361 | 0.002912 | 0.003203 | 0.001849 | 0.000702 | 0.002465 | 0.004561 | 0.003668 | 0.004162 | 0.003326 | 0.002518 | 0.003061 | 0.002881 | 0.003651 |
|   | GG | 0.007619 | 0.002738 | 0.005495 | 0.004081 | 0.004029 | 0.002016 | 0.000802 | 0.003727 | 0.006202 | 0.003071 | 0.004700 | 0.003533 | 0.002293 | 0.002433 | 0.003687 | 0.003701 |
|   | GT | 0.004120 | 0.001700 | 0.002299 | 0.002791 | 0.002469 | 0.001239 | 0.000299 | 0.002284 | 0.002306 | 0.001672 | 0.001891 | 0.001917 | 0.003036 | 0.001848 | 0.002496 | 0.003916 |
|   | TA | 0.009772 | 0.003453 | 0.005421 | 0.006905 | 0.003727 | 0.002003 | 0.000392 | 0.003389 | 0.004204 | 0.002262 | 0.002651 | 0.003436 | 0.004919 | 0.002648 | 0.003683 | 0.005705 |
|   | TC | 0.006253 | 0.002821 | 0.004095 | 0.004252 | 0.004942 | 0.003256 | 0.000822 | 0.005413 | 0.005610 | 0.003803 | 0.004311 | 0.006064 | 0.003741 | 0.003969 | 0.004796 | 0.006077 |
|   | TG | 0.008314 | 0.004036 | 0.005769 | 0.005496 | 0.003939 | 0.003146 | 0.000561 | 0.005084 | 0.005192 | 0.003605 | 0.003905 | 0.004402 | 0.003587 | 0.003122 | 0.005111 | 0.004990 |
|   | TT | 0.008717 | 0.002996 | 0.003852 | 0.005764 | 0.003991 | 0.002404 | 0.000402 | 0.004102 | 0.003875 | 0.002356 | 0.002644 | 0.003314 | 0.005162 | 0.003303 | 0.003748 | 0.007948 |
|   |    |          |          |          |          |          |          |          |          |          |          |          |          |          |          |          |          |
| C |    | AA       | AC       | AG       | AT       | CA       | CC       | CG       | CT       | GA       | GC       | GG       | GT       | TA       | TC       | TG       | TT       |
|   | AA | 0.008397 | 0.005274 | 0.006693 | 0.006865 | 0.005902 | 0.004397 | 0.000650 | 0.004697 | 0.000885 | 0.000632 | 0.000689 | 0.000935 | 0.005063 | 0.005768 | 0.006948 | 0.006405 |
|   | AC | 0.004824 | 0.004562 | 0.005775 | 0.004998 | 0.005635 | 0.004062 | 0.000789 | 0.004167 | 0.000738 | 0.000605 | 0.000625 | 0.000730 | 0.003379 | 0.003972 | 0.005179 | 0.004481 |
|   | AG | 0.006814 | 0.004360 | 0.007092 | 0.006072 | 0.005961 | 0.004721 | 0.000855 | 0.006070 | 0.001159 | 0.000735 | 0.000840 | 0.000889 | 0.003623 | 0.004361 | 0.006014 | 0.005693 |
|   | AT | 0.006403 | 0.005140 | 0.005857 | 0.005900 | 0.005859 | 0.005085 | 0.000634 | 0.005241 | 0.000821 | 0.000584 | 0.000499 | 0.000679 | 0.004627 | 0.005755 | 0.006335 | 0.007583 |
|   | CA | 0.005994 | 0.006146 | 0.007840 | 0.006072 | 0.006146 | 0.004176 | 0.000966 | 0.004961 | 0.001352 | 0.001074 | 0.001272 | 0.001453 | 0.003359 | 0.004981 | 0.007119 | 0.006483 |
|   | CC | 0.005066 | 0.005733 | 0.007688 | 0.005879 | 0.006689 | 0.003862 | 0.001439 | 0.004901 | 0.000864 | 0.001196 | 0.001389 | 0.000966 | 0.002764 | 0.005148 | 0.007387 | 0.005435 |
|   | CG | 0.000668 | 0.000716 | 0.001050 | 0.000662 | 0.000951 | 0.000936 | 0.000381 | 0.000876 | 0.000178 | 0.000321 | 0.000361 | 0.000216 | 0.000469 | 0.001001 | 0.001110 | 0.000863 |
|   | CT | 0.005801 | 0.004455 | 0.007720 | 0.005844 | 0.008621 | 0.006077 | 0.001211 | 0.008435 | 0.000818 | 0.000698 | 0.001000 | 0.000832 | 0.004435 | 0.006438 | 0.008930 | 0.009087 |
|   | GA | 0.004373 | 0.004038 | 0.005658 | 0.004845 | 0.003859 | 0.003745 | 0.000621 | 0.003768 | 0.000758 | 0.000664 | 0.001061 | 0.000828 | 0.003109 | 0.004929 | 0.006683 | 0.005049 |
|   | GC | 0.004337 | 0.003838 | 0.004803 | 0.004917 | 0.004369 | 0.003486 | 0.000977 | 0.003821 | 0.000603 | 0.000794 | 0.000903 | 0.000764 | 0.002239 | 0.004026 | 0.006209 | 0.004738 |
|   | GG | 0.005477 | 0.002860 | 0.005965 | 0.003925 | 0.004172 | 0.002916 | 0.000868 | 0.003752 | 0.000638 | 0.000710 | 0.001212 | 0.000734 | 0.002766 | 0.004456 | 0.005620 | 0.004769 |
|   | GT | 0.004061 | 0.003890 | 0.005004 | 0.004703 | 0.005974 | 0.003549 | 0.000982 | 0.004216 | 0.000471 | 0.001125 | 0.001029 | 0.001112 | 0.002885 | 0.004280 | 0.005030 | 0.005629 |
|   | TA | 0.005329 | 0.003356 | 0.005353 | 0.005931 | 0.004267 | 0.002317 | 0.000471 | 0.003590 | 0.000548 | 0.000341 | 0.000504 | 0.000757 | 0.003418 | 0.003514 | 0.005146 | 0.005769 |
|   | TC | 0.007721 | 0.004755 | 0.009193 | 0.008447 | 0.007596 | 0.005484 | 0.001206 | 0.007817 | 0.001023 | 0.000707 | 0.000874 | 0.001037 | 0.004265 | 0.007105 | 0.007651 | 0.008905 |
|   | TG | 0.006016 | 0.003525 | 0.007685 | 0.006184 | 0.006759 | 0.004056 | 0.000958 | 0.006448 | 0.001030 | 0.000558 | 0.000871 | 0.000856 | 0.004284 | 0.004781 | 0.007866 | 0.007457 |
|   | TT | 0.008020 | 0.006540 | 0.008921 | 0.009410 | 0.009556 | 0.007351 | 0.000813 | 0.010005 | 0.000817 | 0.000595 | 0.000709 | 0.000917 | 0.006805 | 0.009786 | 0.009078 | 0.013416 |
|   |    |          |          |          |          |          |          |          |          |          |          |          |          |          |          |          |          |
| G |    | AA       | AC       | AG       | AT       | CA       | CC       | CG       | CT       | GA       | GC       | GG       | GT       | TA       | TC       | TG       | TT       |
|   | AA | 0.013395 | 0.005623 | 0.009052 | 0.007634 | 0.007421 | 0.004752 | 0.000923 | 0.005684 | 0.008910 | 0.004722 | 0.005449 | 0.004511 | 0.005795 | 0.005024 | 0.006460 | 0.006400 |
|   | AC | 0.000834 | 0.001078 | 0.000760 | 0.000644 | 0.000806 | 0.000706 | 0.000220 | 0.000859 | 0.000988 | 0.000745 | 0.000943 | 0.000707 | 0.000726 | 0.000794 | 0.001400 | 0.000894 |
|   | AG | 0.010036 | 0.004196 | 0.008461 | 0.005256 | 0.006446 | 0.003771 | 0.000932 | 0.006078 | 0.007842 | 0.003844 | 0.004915 | 0.004196 | 0.003624 | 0.003765 | 0.004986 | 0.004720 |
|   | AT | 0.009396 | 0.004724 | 0.005847 | 0.005946 | 0.006183 | 0.003926 | 0.000720 | 0.006085 | 0.008461 | 0.004938 | 0.005888 | 0.005041 | 0.005959 | 0.004867 | 0.006088 | 0.006916 |
|   | CA | 0.009148 | 0.005065 | 0.008968 | 0.006417 | 0.007923 | 0.005677 | 0.001180 | 0.006071 | 0.007704 | 0.006218 | 0.007423 | 0.005244 | 0.005206 | 0.006740 | 0.007161 | 0.007038 |
|   | CC | 0.000658 | 0.000990 | 0.000951 | 0.000468 | 0.000815 | 0.001170 | 0.000361 | 0.000807 | 0.000810 | 0.000835 | 0.001313 | 0.000578 | 0.000469 | 0.001013 | 0.001209 | 0.000662 |
|   | CG | 0.000749 | 0.000950 | 0.001130 | 0.000597 | 0.000905 | 0.000836 | 0.000384 | 0.000797 | 0.001135 | 0.000939 | 0.001403 | 0.000747 | 0.000446 | 0.000583 | 0.000916 | 0.000612 |
|   | CT | 0.008965 | 0.005065 | 0.007802 | 0.005945 | 0.007708 | 0.005990 | 0.001130 | 0.007158 | 0.009206 | 0.004835 | 0.007736 | 0.005837 | 0.005408 | 0.005694 | 0.007892 | 0.006809 |
|   | GA | 0.009777 | 0.004284 | 0.006469 | 0.005768 | 0.004775 | 0.004423 | 0.001045 | 0.004365 | 0.007077 | 0.004004 | 0.005160 | 0.003988 | 0.003543 | 0.004936 | 0.005006 | 0.005806 |
|   | GC | 0.000546 | 0.001108 | 0.000649 | 0.000557 | 0.000499 | 0.000681 | 0.000319 | 0.000686 | 0.000650 | 0.000763 | 0.001145 | 0.000580 | 0.000319 | 0.000632 | 0.001016 | 0.000609 |
|   | GG | 0.007366 | 0.003567 | 0.006117 | 0.005114 | 0.004064 | 0.002904 | 0.000987 | 0.004727 | 0.005484 | 0.003485 | 0.003860 | 0.004064 | 0.002340 | 0.003760 | 0.004195 | 0.004439 |
|   | GT | 0.006560 | 0.003911 | 0.004478 | 0.005174 | 0.003517 | 0.002855 | 0.000754 | 0.004337 | 0.004738 | 0.003844 | 0.005719 | 0.004599 | 0.003386 | 0.004067 | 0.006131 | 0.005330 |
|   | TA | 0.006769 | 0.002871 | 0.004408 | 0.004626 | 0.004240 | 0.002742 | 0.000490 | 0.003614 | 0.004231 | 0.002217 | 0.002737 | 0.003360 | 0.003421 | 0.003060 | 0.003323 | 0.005042 |
|   | TC | 0.000750 | 0.000421 | 0.000764 | 0.000777 | 0.000976 | 0.000596 | 0.000178 | 0.001107 | 0.000974 | 0.000577 | 0.000821 | 0.000704 | 0.000507 | 0.000694 | 0.001283 | 0.000828 |
|   | TG | 0.009635 | 0.005993 | 0.008677 | 0.005939 | 0.006804 | 0.004184 | 0.001000 | 0.005999 | 0.007662 | 0.004389 | 0.006719 | 0.005707 | 0.004319 | 0.003882 | 0.006159 | 0.005946 |
|   | TT | 0.008009 | 0.004066 | 0.005794 | 0.006427 | 0.006004 | 0.005440 | 0.000712 | 0.006828 | 0.007732 | 0.004319 | 0.005059 | 0.004845 | 0.005339 | 0.004354 | 0.005969 | 0.008416 |
|   |    |          |          |          |          |          |          |          |          |          |          |          |          |          |          |          |          |
| T |    | AA       | AC       | AG       | AT       | CA       | CC       | CG       | CT       | GA       | GC       | GG       | GT       | TA       | TC       | TG       | TT       |
|   | AA | 0.007971 | 0.003905 | 0.003970 | 0.007337 | 0.004955 | 0.003681 | 0.000493 | 0.004552 | 0.006037 | 0.003633 | 0.004548 | 0.005126 | 0.005706 | 0.004815 | 0.003853 | 0.008323 |
|   | AC | 0.003353 | 0.001922 | 0.002302 | 0.003137 | 0.004405 | 0.003511 | 0.000570 | 0.005311 | 0.006091 | 0.003307 | 0.004487 | 0.004761 | 0.003471 | 0.003896 | 0.003195 | 0.006445 |
|   | AG | 0.004131 | 0.002299 | 0.002730 | 0.003722 | 0.005072 | 0.003719 | 0.001330 | 0.004060 | 0.005387 | 0.002474 | 0.004240 | 0.003615 | 0.003417 | 0.004052 | 0.003973 | 0.005961 |

|   |                                 |          |          |                       |          |          |          |          |          |          |          |          |          |          |          |          |          |  |
|---|---------------------------------|----------|----------|-----------------------|----------|----------|----------|----------|----------|----------|----------|----------|----------|----------|----------|----------|----------|--|
|   | AT                              | 0.005770 | 0.002781 | 0.002954              | 0.005479 | 0.005461 | 0.004045 | 0.000436 | 0.006749 | 0.004231 | 0.002873 | 0.003127 | 0.003975 | 0.006926 | 0.006880 | 0.005634 | 0.011585 |  |
|   | CA                              | 0.003782 | 0.002520 | 0.002927              | 0.004388 | 0.005119 | 0.003672 | 0.000631 | 0.005343 | 0.004810 | 0.002885 | 0.005248 | 0.004405 | 0.003728 | 0.004211 | 0.003878 | 0.007651 |  |
|   | CC                              | 0.002679 | 0.001910 | 0.002215              | 0.002271 | 0.003897 | 0.004697 | 0.000727 | 0.005202 | 0.004337 | 0.004158 | 0.006591 | 0.003901 | 0.002678 | 0.004763 | 0.004002 | 0.005473 |  |
|   | CG                              | 0.000376 | 0.000284 | 0.000330              | 0.000459 | 0.000528 | 0.000760 | 0.000122 | 0.000841 | 0.000781 | 0.000680 | 0.000937 | 0.001137 | 0.000375 | 0.000486 | 0.000456 | 0.000827 |  |
|   | CT                              | 0.003876 | 0.002309 | 0.002921              | 0.003546 | 0.005762 | 0.005502 | 0.000695 | 0.006738 | 0.004082 | 0.003344 | 0.003859 | 0.003465 | 0.005442 | 0.006322 | 0.006203 | 0.008885 |  |
|   | GA                              | 0.003322 | 0.001838 | 0.001986              | 0.003212 | 0.003082 | 0.002431 | 0.000399 | 0.003363 | 0.003946 | 0.003066 | 0.004383 | 0.003336 | 0.002649 | 0.003335 | 0.002566 | 0.005119 |  |
|   | GC                              | 0.002386 | 0.001676 | 0.001534              | 0.002407 | 0.003594 | 0.003048 | 0.000483 | 0.003340 | 0.003804 | 0.003647 | 0.003904 | 0.003474 | 0.002290 | 0.003709 | 0.002504 | 0.004970 |  |
|   | GG                              | 0.002424 | 0.001247 | 0.001898              | 0.002118 | 0.003113 | 0.002006 | 0.000686 | 0.002759 | 0.003234 | 0.001856 | 0.003932 | 0.002603 | 0.002014 | 0.002485 | 0.002968 | 0.003761 |  |
|   | GT                              | 0.003016 | 0.001706 | 0.002015              | 0.002824 | 0.004017 | 0.002701 | 0.000465 | 0.003861 | 0.002823 | 0.002538 | 0.003427 | 0.003025 | 0.003470 | 0.004129 | 0.003767 | 0.006576 |  |
|   | TA                              | 0.005206 | 0.003036 | 0.002999              | 0.007178 | 0.003573 | 0.002274 | 0.000328 | 0.004169 | 0.003736 | 0.002502 | 0.003156 | 0.004134 | 0.004970 | 0.004344 | 0.003978 | 0.009906 |  |
|   | TC                              | 0.003900 | 0.002326 | 0.003162              | 0.004078 | 0.005219 | 0.006168 | 0.000624 | 0.006847 | 0.005608 | 0.004551 | 0.004709 | 0.006248 | 0.004257 | 0.006303 | 0.005143 | 0.009925 |  |
|   | TG                              | 0.004033 | 0.002497 | 0.002873              | 0.005015 | 0.003950 | 0.004033 | 0.000530 | 0.005103 | 0.004945 | 0.003203 | 0.004395 | 0.006140 | 0.003776 | 0.004034 | 0.004453 | 0.007399 |  |
|   | TT                              | 0.008772 | 0.004156 | 0.004390              | 0.008385 | 0.008327 | 0.007610 | 0.000580 | 0.010640 | 0.006268 | 0.004813 | 0.005274 | 0.006753 | 0.009839 | 0.009768 | 0.007490 | 0.016554 |  |
|   | <b>Micrococcus sp. 28 pSD10</b> |          |          | <b>forward strand</b> |          |          |          |          |          |          |          |          |          |          |          |          |          |  |
| A |                                 | AA       | AC       | AG                    | AT       | CA       | CC       | CG       | CT       | GA       | GC       | GG       | GT       | TA       | TC       | TG       | TT       |  |
|   | AA                              | 0.001266 | 0.000806 | 0.001036              | 0.001151 | 0.001151 | 0.001957 | 0.001957 | 0.000345 | 0.000921 | 0.002878 | 0.001266 | 0.001381 | 0.000460 | 0.001957 | 0.001036 | 0.000691 |  |
|   | AC                              | 0.000576 | 0.004489 | 0.003569              | 0.000921 | 0.001381 | 0.010936 | 0.006331 | 0.000691 | 0.001957 | 0.004835 | 0.005871 | 0.001036 | 0.000576 | 0.004029 | 0.003799 | 0.000691 |  |
|   | AG                              | 0.001381 | 0.005065 | 0.006677              | 0.001727 | 0.001727 | 0.008518 | 0.006677 | 0.001266 | 0.002417 | 0.005180 | 0.003914 | 0.001151 | 0.000691 | 0.005410 | 0.005295 | 0.001151 |  |
|   | AT                              | 0.000115 | 0.000345 | 0.000230              | 0.000230 | 0.000691 | 0.002417 | 0.000921 | 0.000921 | 0.000806 | 0.000691 | 0.000806 | 0.000115 | 0.000115 | 0.000806 | 0.000345 | 0.000115 |  |
|   | CA                              | 0.000806 | 0.001381 | 0.002187              | 0.000576 | 0.002878 | 0.006331 | 0.007252 | 0.001842 | 0.004605 | 0.005641 | 0.006562 | 0.003108 | 0.000115 | 0.000806 | 0.001957 | 0.000345 |  |
|   | CC                              | 0.001496 | 0.005986 | 0.008173              | 0.000691 | 0.005295 | 0.021757 | 0.019224 | 0.005065 | 0.005871 | 0.018188 | 0.015310 | 0.004029 | 0.000576 | 0.010245 | 0.009555 | 0.002878 |  |
|   | CG                              | 0.003684 | 0.009785 | 0.010360              | 0.002417 | 0.004605 | 0.016346 | 0.016576 | 0.004835 | 0.010130 | 0.019915 | 0.023023 | 0.007943 | 0.001842 | 0.011051 | 0.011281 | 0.001842 |  |
|   | CT                              | 0.000806 | 0.000806 | 0.000806              | 0.000000 | 0.004259 | 0.004374 | 0.005756 | 0.001612 | 0.000576 | 0.000806 | 0.001036 | 0.000230 | 0.000576 | 0.001036 | 0.001151 | 0.000806 |  |
|   | GA                              | 0.002072 | 0.002763 | 0.002763              | 0.001957 | 0.005641 | 0.006562 | 0.011166 | 0.004029 | 0.006446 | 0.008634 | 0.008634 | 0.004489 | 0.000806 | 0.004489 | 0.001957 | 0.001151 |  |
|   | GC                              | 0.001151 | 0.004029 | 0.005180              | 0.000921 | 0.006101 | 0.018303 | 0.013238 | 0.005295 | 0.008288 | 0.016461 | 0.013929 | 0.004489 | 0.001151 | 0.009785 | 0.007022 | 0.001381 |  |
|   | GG                              | 0.002417 | 0.007598 | 0.006101              | 0.002648 | 0.009670 | 0.010706 | 0.013468 | 0.006101 | 0.008634 | 0.013238 | 0.013699 | 0.007482 | 0.000576 | 0.010245 | 0.010475 | 0.002302 |  |
|   | GT                              | 0.000576 | 0.000806 | 0.000230              | 0.000345 | 0.001612 | 0.003453 | 0.002763 | 0.002417 | 0.001842 | 0.002417 | 0.002993 | 0.001727 | 0.000921 | 0.002417 | 0.000691 | 0.000345 |  |
|   | TA                              | 0.000000 | 0.000460 | 0.000576              | 0.000460 | 0.000345 | 0.000576 | 0.001151 | 0.000000 | 0.000230 | 0.000115 | 0.000806 | 0.000345 | 0.000115 | 0.000460 | 0.000115 | 0.000000 |  |
|   | TC                              | 0.001727 | 0.003684 | 0.003108              | 0.000691 | 0.002302 | 0.013353 | 0.010130 | 0.001036 | 0.002993 | 0.007943 | 0.007713 | 0.003223 | 0.000460 | 0.006101 | 0.006792 | 0.000806 |  |
|   | TG                              | 0.001957 | 0.004835 | 0.005295              | 0.001612 | 0.001842 | 0.011051 | 0.007022 | 0.001727 | 0.001266 | 0.009900 | 0.007022 | 0.002533 | 0.000921 | 0.008173 | 0.007598 | 0.001612 |  |
|   | TT                              | 0.000000 | 0.000115 | 0.000230              | 0.000000 | 0.000576 | 0.001036 | 0.000806 | 0.000230 | 0.000000 | 0.000576 | 0.000460 | 0.000115 | 0.000000 | 0.000806 | 0.000691 | 0.000115 |  |
|   |                                 |          |          |                       |          |          |          |          |          |          |          |          |          |          |          |          |          |  |
| C |                                 | AA       | AC       | AG                    | AT       | CA       | CC       | CG       | CT       | GA       | GC       | GG       | GT       | TA       | TC       | TG       | TT       |  |
|   | AA                              | 0.000912 | 0.001882 | 0.001654              | 0.000513 | 0.001882 | 0.001939 | 0.002794 | 0.001141 | 0.002623 | 0.003650 | 0.003022 | 0.001312 | 0.000456 | 0.001312 | 0.000969 | 0.000456 |  |
|   | AC                              | 0.002053 | 0.005646 | 0.004733              | 0.002965 | 0.002794 | 0.006159 | 0.006273 | 0.002281 | 0.004049 | 0.008269 | 0.007698 | 0.004334 | 0.000798 | 0.003365 | 0.004961 | 0.001026 |  |
|   | AG                              | 0.001255 | 0.005018 | 0.007128              | 0.001654 | 0.002851 | 0.004448 | 0.005703 | 0.001768 | 0.003022 | 0.007014 | 0.004733 | 0.002566 | 0.000342 | 0.003650 | 0.005018 | 0.001768 |  |
|   | AT                              | 0.000912 | 0.003536 | 0.003022              | 0.001654 | 0.002224 | 0.003136 | 0.003422 | 0.001654 | 0.003878 | 0.004676 | 0.003193 | 0.002167 | 0.000684 | 0.001768 | 0.001654 | 0.000627 |  |
|   | CA                              | 0.001141 | 0.002509 | 0.002224              | 0.001654 | 0.006900 | 0.008839 | 0.011804 | 0.003992 | 0.005246 | 0.007413 | 0.007870 | 0.003878 | 0.000684 | 0.002110 | 0.002395 | 0.000969 |  |
|   | CC                              | 0.001483 | 0.006729 | 0.006102              | 0.002623 | 0.005246 | 0.006216 | 0.011177 | 0.003022 | 0.007527 | 0.012318 | 0.010265 | 0.004562 | 0.000912 | 0.004277 | 0.006387 | 0.001939 |  |
|   | CG                              | 0.001597 | 0.005589 | 0.007014              | 0.003365 | 0.008953 | 0.013572 | 0.018248 | 0.004163 | 0.007641 | 0.012432 | 0.011861 | 0.004676 | 0.002053 | 0.004505 | 0.006672 | 0.002680 |  |
|   | CT                              | 0.001369 | 0.004163 | 0.002053              | 0.001198 | 0.003593 | 0.002965 | 0.004277 | 0.002965 | 0.005474 | 0.004277 | 0.005589 | 0.003136 | 0.000912 | 0.001768 | 0.001711 | 0.000912 |  |
|   | GA                              | 0.001711 | 0.003536 | 0.001996              | 0.001711 | 0.005760 | 0.005817 | 0.007584 | 0.003764 | 0.006330 | 0.006729 | 0.004733 | 0.003650 | 0.000513 | 0.002509 | 0.002623 | 0.001141 |  |
|   | GC                              | 0.003307 | 0.008611 | 0.007185              | 0.004277 | 0.007299 | 0.009295 | 0.013173 | 0.006216 | 0.011975 | 0.017336 | 0.014599 | 0.007299 | 0.001255 | 0.004334 | 0.004505 | 0.001654 |  |
|   | GG                              | 0.001996 | 0.006615 | 0.004562              | 0.003250 | 0.009238 | 0.012203 | 0.020244 | 0.004676 | 0.006273 | 0.009124 | 0.010036 | 0.006045 | 0.001026 | 0.003878 | 0.005474 | 0.001711 |  |
|   | GT                              | 0.001198 | 0.003935 | 0.004049              | 0.002281 | 0.003821 | 0.003307 | 0.006216 | 0.003136 | 0.003878 | 0.004505 | 0.004961 | 0.004619 | 0.001141 | 0.002338 | 0.002737 | 0.001711 |  |
|   | TA                              | 0.000855 | 0.001483 | 0.000684              | 0.000570 | 0.001026 | 0.000969 | 0.002110 | 0.001312 | 0.001540 | 0.001255 | 0.001141 | 0.001255 | 0.000342 | 0.000855 | 0.000741 | 0.000627 |  |
|   | TC                              | 0.001255 | 0.004733 | 0.003593              | 0.001825 | 0.001654 | 0.003821 | 0.004106 | 0.001939 | 0.003479 | 0.005931 | 0.004847 | 0.002908 | 0.000456 | 0.004106 | 0.002566 | 0.001825 |  |
|   | TG                              | 0.000684 | 0.004049 | 0.002737              | 0.001198 | 0.002395 | 0.006045 | 0.006729 | 0.001255 | 0.002167 | 0.005531 | 0.004220 | 0.003193 | 0.000342 | 0.003479 | 0.003650 | 0.001141 |  |
|   | TT                              | 0.001026 | 0.001882 | 0.001597              | 0.001996 | 0.001939 | 0.001939 | 0.003193 | 0.001312 | 0.002851 | 0.003307 | 0.003365 | 0.001882 | 0.000171 | 0.001768 | 0.001426 | 0.001255 |  |
|   |                                 |          |          |                       |          |          |          |          |          |          |          |          |          |          |          |          |          |  |
| G |                                 | AA       | AC       | AG                    | AT       | CA       | CC       | CG       | CT       | GA       | GC       | GG       | GT       | TA       | TC       | TG       | TT       |  |
|   | AA                              | 0.002006 | 0.001475 | 0.001180              | 0.001652 | 0.001829 | 0.003127 | 0.002714 | 0.001357 | 0.002065 | 0.003009 | 0.002065 | 0.001593 | 0.000590 | 0.001770 | 0.001239 | 0.001121 |  |

|   |                                 |          |          |                       |          |          |          |          |          |          |          |          |          |          |          |          |          |
|---|---------------------------------|----------|----------|-----------------------|----------|----------|----------|----------|----------|----------|----------|----------|----------|----------|----------|----------|----------|
|   | AC                              | 0.002655 | 0.004896 | 0.005840              | 0.002655 | 0.002537 | 0.008967 | 0.005781 | 0.002596 | 0.003540 | 0.006548 | 0.004425 | 0.003127 | 0.000767 | 0.004307 | 0.003953 | 0.001475 |
|   | AG                              | 0.002419 | 0.004130 | 0.004837              | 0.003009 | 0.002655 | 0.009203 | 0.005545 | 0.001652 | 0.002242 | 0.006076 | 0.003422 | 0.002596 | 0.000531 | 0.003717 | 0.004189 | 0.001357 |
|   | AT                              | 0.001947 | 0.002832 | 0.002478              | 0.002655 | 0.001298 | 0.003304 | 0.002537 | 0.001711 | 0.003127 | 0.004130 | 0.002183 | 0.002537 | 0.000472 | 0.001121 | 0.001829 | 0.000826 |
|   | CA                              | 0.002537 | 0.003540 | 0.002124              | 0.001947 | 0.005899 | 0.006076 | 0.007256 | 0.004719 | 0.005781 | 0.006902 | 0.005840 | 0.003481 | 0.000295 | 0.002419 | 0.002596 | 0.001357 |
|   | CC                              | 0.004543 | 0.007197 | 0.012271              | 0.003894 | 0.006961 | 0.018819 | 0.014099 | 0.005545 | 0.006666 | 0.017521 | 0.008672 | 0.006017 | 0.001416 | 0.006607 | 0.008731 | 0.002891 |
|   | CG                              | 0.002655 | 0.005840 | 0.007551              | 0.003953 | 0.008554 | 0.017934 | 0.012920 | 0.005309 | 0.005899 | 0.008259 | 0.006961 | 0.004071 | 0.001475 | 0.004543 | 0.007256 | 0.003245 |
|   | CT                              | 0.001357 | 0.003304 | 0.002832              | 0.002301 | 0.003304 | 0.005073 | 0.005899 | 0.002891 | 0.005840 | 0.007551 | 0.005014 | 0.003245 | 0.000590 | 0.002183 | 0.002419 | 0.001298 |
|   | GA                              | 0.003068 | 0.003540 | 0.002360              | 0.002655 | 0.007492 | 0.005191 | 0.007256 | 0.004955 | 0.006607 | 0.008495 | 0.005309 | 0.004248 | 0.000885 | 0.003363 | 0.003304 | 0.002360 |
|   | GC                              | 0.003776 | 0.005250 | 0.006961              | 0.003894 | 0.006135 | 0.011386 | 0.012330 | 0.005604 | 0.006961 | 0.012684 | 0.007669 | 0.004719 | 0.001770 | 0.006194 | 0.006135 | 0.002891 |
|   | GG                              | 0.002891 | 0.004425 | 0.005191              | 0.002714 | 0.004071 | 0.009911 | 0.007669 | 0.003481 | 0.003835 | 0.006017 | 0.003363 | 0.003422 | 0.000885 | 0.003953 | 0.005840 | 0.001829 |
|   | GT                              | 0.002832 | 0.003304 | 0.003776              | 0.003481 | 0.003481 | 0.005427 | 0.005486 | 0.003599 | 0.004425 | 0.007197 | 0.004660 | 0.004484 | 0.000944 | 0.003363 | 0.002537 | 0.001475 |
|   | TA                              | 0.000236 | 0.000649 | 0.000472              | 0.000354 | 0.000295 | 0.001003 | 0.000708 | 0.000354 | 0.000177 | 0.000885 | 0.001180 | 0.000472 | 0.000118 | 0.000177 | 0.000531 | 0.000354 |
|   | TC                              | 0.002596 | 0.004601 | 0.006312              | 0.003009 | 0.002242 | 0.007138 | 0.005663 | 0.002419 | 0.002773 | 0.007905 | 0.004366 | 0.002655 | 0.001239 | 0.005309 | 0.004071 | 0.001475 |
|   | TG                              | 0.001652 | 0.006017 | 0.004955              | 0.002242 | 0.001652 | 0.010914 | 0.006135 | 0.002065 | 0.003304 | 0.004601 | 0.002891 | 0.002360 | 0.000531 | 0.004425 | 0.004896 | 0.001298 |
|   | TT                              | 0.000826 | 0.001534 | 0.001357              | 0.001003 | 0.000767 | 0.003127 | 0.001888 | 0.000767 | 0.001593 | 0.002360 | 0.001239 | 0.001003 | 0.000472 | 0.001888 | 0.000826 | 0.000708 |
|   |                                 |          |          |                       |          |          |          |          |          |          |          |          |          |          |          |          |          |
| T |                                 | AA       | AC       | AG                    | AT       | CA       | CC       | CG       | CT       | GA       | GC       | GG       | GT       | TA       | TC       | TG       | TT       |
|   | AA                              | 0.000000 | 0.001461 | 0.000266              | 0.000000 | 0.001328 | 0.002921 | 0.003320 | 0.001328 | 0.001593 | 0.001593 | 0.001992 | 0.000797 | 0.000000 | 0.001992 | 0.000266 | 0.000266 |
|   | AC                              | 0.000664 | 0.003585 | 0.000133              | 0.000398 | 0.003452 | 0.005311 | 0.005843 | 0.001195 | 0.002125 | 0.004116 | 0.007702 | 0.001859 | 0.000266 | 0.003718 | 0.002257 | 0.001195 |
|   | AG                              | 0.000266 | 0.002523 | 0.000797              | 0.000531 | 0.002788 | 0.006241 | 0.006506 | 0.002125 | 0.003851 | 0.005311 | 0.006772 | 0.001726 | 0.000133 | 0.007834 | 0.003054 | 0.000797 |
|   | AT                              | 0.000000 | 0.000398 | 0.000133              | 0.000000 | 0.001992 | 0.003187 | 0.003320 | 0.000797 | 0.001859 | 0.001195 | 0.001195 | 0.001062 | 0.000531 | 0.001726 | 0.000797 | 0.000531 |
|   | CA                              | 0.000398 | 0.001726 | 0.000797              | 0.000398 | 0.007702 | 0.009826 | 0.013942 | 0.003054 | 0.008498 | 0.005843 | 0.012349 | 0.003718 | 0.000266 | 0.003054 | 0.002125 | 0.001062 |
|   | CC                              | 0.000664 | 0.005444 | 0.001062              | 0.000664 | 0.005843 | 0.011419 | 0.016465 | 0.003851 | 0.007834 | 0.013810 | 0.016996 | 0.004515 | 0.000531 | 0.006506 | 0.006374 | 0.001859 |
|   | CG                              | 0.001062 | 0.003984 | 0.004515              | 0.002125 | 0.012349 | 0.016067 | 0.015801 | 0.007038 | 0.011287 | 0.014606 | 0.018855 | 0.007569 | 0.000664 | 0.008233 | 0.009560 | 0.000797 |
|   | CT                              | 0.000133 | 0.000929 | 0.000266              | 0.000664 | 0.004647 | 0.006108 | 0.010490 | 0.003718 | 0.003452 | 0.005179 | 0.005710 | 0.003452 | 0.000531 | 0.002656 | 0.001328 | 0.000664 |
|   | GA                              | 0.000531 | 0.001992 | 0.001461              | 0.000531 | 0.011419 | 0.010092 | 0.013146 | 0.005179 | 0.011818 | 0.011287 | 0.012083 | 0.004249 | 0.000266 | 0.003452 | 0.002523 | 0.001726 |
|   | GC                              | 0.000929 | 0.005046 | 0.000664              | 0.001992 | 0.008498 | 0.008100 | 0.014075 | 0.005046 | 0.009959 | 0.014075 | 0.018324 | 0.005975 | 0.000664 | 0.009162 | 0.005710 | 0.001461 |
|   | GG                              | 0.000664 | 0.002656 | 0.002921              | 0.001593 | 0.009826 | 0.007834 | 0.013146 | 0.006506 | 0.012482 | 0.014872 | 0.014341 | 0.007967 | 0.000797 | 0.008764 | 0.005710 | 0.002125 |
|   | GT                              | 0.000133 | 0.000929 | 0.000398              | 0.000664 | 0.007038 | 0.007834 | 0.011021 | 0.005046 | 0.004515 | 0.006506 | 0.005577 | 0.004116 | 0.000398 | 0.002257 | 0.001461 | 0.000398 |
|   | TA                              | 0.000266 | 0.000531 | 0.000266              | 0.000531 | 0.000929 | 0.001328 | 0.002257 | 0.001328 | 0.000531 | 0.001062 | 0.001062 | 0.000664 | 0.000000 | 0.000929 | 0.000266 | 0.000398 |
|   | TC                              | 0.000531 | 0.004382 | 0.001195              | 0.000664 | 0.002390 | 0.006639 | 0.007038 | 0.002125 | 0.001992 | 0.006905 | 0.006241 | 0.002125 | 0.000398 | 0.005843 | 0.003718 | 0.000398 |
|   | TG                              | 0.000266 | 0.002390 | 0.002125              | 0.000797 | 0.002257 | 0.007967 | 0.006108 | 0.002921 | 0.002390 | 0.005975 | 0.007303 | 0.001726 | 0.000266 | 0.006108 | 0.002257 | 0.000664 |
|   | TT                              | 0.000133 | 0.000664 | 0.000266              | 0.000531 | 0.001726 | 0.002390 | 0.002257 | 0.001195 | 0.000797 | 0.001859 | 0.001726 | 0.000000 | 0.000133 | 0.000929 | 0.000664 | 0.000398 |
|   | <b>Micrococcus sp. 28 pSD10</b> |          |          | <b>reverse strand</b> |          |          |          |          |          |          |          |          |          |          |          |          |          |
| A |                                 | AA       | AC       | AG                    | AT       | CA       | CC       | CG       | CT       | GA       | GC       | GG       | GT       | TA       | TC       | TG       | TT       |
|   | AA                              | 0.000398 | 0.000398 | 0.000664              | 0.000531 | 0.000664 | 0.002125 | 0.000797 | 0.000797 | 0.000398 | 0.001461 | 0.001859 | 0.001195 | 0.000398 | 0.001726 | 0.001062 | 0.000266 |
|   | AC                              | 0.000000 | 0.004116 | 0.003452              | 0.001062 | 0.001726 | 0.007967 | 0.007569 | 0.001726 | 0.002125 | 0.005975 | 0.004515 | 0.001859 | 0.000664 | 0.004249 | 0.003718 | 0.000797 |
|   | AG                              | 0.001195 | 0.005046 | 0.003718              | 0.000797 | 0.002921 | 0.006506 | 0.007038 | 0.002125 | 0.002125 | 0.005046 | 0.003851 | 0.001195 | 0.001328 | 0.005179 | 0.003054 | 0.001328 |
|   | AT                              | 0.000531 | 0.000664 | 0.000664              | 0.000000 | 0.000797 | 0.001593 | 0.002125 | 0.000531 | 0.000664 | 0.001992 | 0.000664 | 0.000398 | 0.000531 | 0.000531 | 0.000398 | 0.000000 |
|   | CA                              | 0.000664 | 0.001461 | 0.001328              | 0.000797 | 0.002257 | 0.005710 | 0.009560 | 0.003054 | 0.003718 | 0.005710 | 0.006374 | 0.002257 | 0.000266 | 0.002523 | 0.002125 | 0.000266 |
|   | CC                              | 0.001726 | 0.005577 | 0.005710              | 0.001195 | 0.007303 | 0.014341 | 0.018855 | 0.006772 | 0.006241 | 0.018324 | 0.016996 | 0.007702 | 0.001062 | 0.012083 | 0.012349 | 0.001992 |
|   | CG                              | 0.002257 | 0.011021 | 0.010490              | 0.003320 | 0.006108 | 0.013146 | 0.015801 | 0.006506 | 0.007038 | 0.014075 | 0.016465 | 0.005843 | 0.002257 | 0.013146 | 0.013942 | 0.003320 |
|   | CT                              | 0.000266 | 0.000398 | 0.000266              | 0.000133 | 0.002125 | 0.002921 | 0.004515 | 0.000797 | 0.001195 | 0.000664 | 0.001062 | 0.000133 | 0.000266 | 0.001461 | 0.000797 | 0.000266 |
|   | GA                              | 0.000929 | 0.002257 | 0.002656              | 0.001726 | 0.006108 | 0.008764 | 0.008233 | 0.007834 | 0.005843 | 0.009162 | 0.006506 | 0.003718 | 0.000929 | 0.003452 | 0.003054 | 0.001992 |
|   | GC                              | 0.001859 | 0.006506 | 0.005179              | 0.001195 | 0.005975 | 0.014872 | 0.014606 | 0.005311 | 0.006905 | 0.014075 | 0.013810 | 0.004116 | 0.001062 | 0.011287 | 0.005843 | 0.001593 |
|   | GG                              | 0.002390 | 0.007834 | 0.006108              | 0.003187 | 0.007967 | 0.007834 | 0.016067 | 0.006241 | 0.006639 | 0.008100 | 0.011419 | 0.005311 | 0.001328 | 0.010092 | 0.009826 | 0.002921 |
|   | GT                              | 0.000664 | 0.000929 | 0.000929              | 0.000398 | 0.002390 | 0.002656 | 0.003984 | 0.002523 | 0.004382 | 0.005046 | 0.005444 | 0.003585 | 0.000531 | 0.001992 | 0.001726 | 0.001461 |
|   | TA                              | 0.000133 | 0.000398 | 0.000531              | 0.000531 | 0.000266 | 0.000797 | 0.000664 | 0.000133 | 0.000398 | 0.000664 | 0.000531 | 0.000266 | 0.000000 | 0.000266 | 0.000266 | 0.000000 |
|   | TC                              | 0.000797 | 0.004515 | 0.003452              | 0.001859 | 0.002390 | 0.012482 | 0.011287 | 0.003851 | 0.001992 | 0.009959 | 0.007834 | 0.002125 | 0.000531 | 0.011818 | 0.008498 | 0.001593 |
|   | TG                              | 0.001726 | 0.007038 | 0.004647              | 0.001992 | 0.002257 | 0.009826 | 0.012349 | 0.002788 | 0.002390 | 0.008498 | 0.005843 | 0.003452 | 0.000929 | 0.011419 | 0.007702 | 0.001328 |
|   | TT                              | 0.000133 | 0.000133 | 0.000133              | 0.000000 | 0.000266 | 0.000664 | 0.001062 | 0.000266 | 0.000531 | 0.000929 | 0.000664 | 0.000664 | 0.000266 | 0.000531 | 0.000398 | 0.000000 |
|   |                                 |          |          |                       |          |          |          |          |          |          |          |          |          |          |          |          |          |
|   |                                 | AA       | AC       | AG                    | AT       | CA       | CC       | CG       | CT       | GA       | GC       | GG       | GT       | TA       | TC       | TG       | TT       |

|   |    |          |          |          |          |          |          |          |          |          |          |          |          |          |          |          |          |
|---|----|----------|----------|----------|----------|----------|----------|----------|----------|----------|----------|----------|----------|----------|----------|----------|----------|
| C | AA | 0.000708 | 0.001475 | 0.001298 | 0.000826 | 0.001298 | 0.001829 | 0.003245 | 0.001357 | 0.001475 | 0.002891 | 0.002891 | 0.001475 | 0.000354 | 0.002360 | 0.001357 | 0.001121 |
|   | AC | 0.001003 | 0.004484 | 0.003245 | 0.002537 | 0.002360 | 0.003422 | 0.004071 | 0.002596 | 0.002655 | 0.004719 | 0.006017 | 0.003127 | 0.000472 | 0.004248 | 0.003481 | 0.001593 |
|   | AG | 0.000767 | 0.003599 | 0.002891 | 0.001711 | 0.002065 | 0.003481 | 0.005309 | 0.001652 | 0.002419 | 0.005604 | 0.005545 | 0.002596 | 0.000354 | 0.004955 | 0.004719 | 0.001357 |
|   | AT | 0.001003 | 0.003481 | 0.002301 | 0.002655 | 0.002242 | 0.002714 | 0.003953 | 0.003009 | 0.003009 | 0.003894 | 0.003894 | 0.002655 | 0.000354 | 0.002655 | 0.001947 | 0.001652 |
|   | CA | 0.000826 | 0.002537 | 0.002419 | 0.001829 | 0.004896 | 0.005840 | 0.007256 | 0.004189 | 0.004071 | 0.006135 | 0.008731 | 0.003953 | 0.000531 | 0.003304 | 0.002596 | 0.001239 |
|   | CC | 0.001239 | 0.004660 | 0.005014 | 0.002183 | 0.002891 | 0.003363 | 0.006961 | 0.003422 | 0.004366 | 0.007669 | 0.008672 | 0.004425 | 0.001180 | 0.005309 | 0.005840 | 0.002065 |
|   | CG | 0.001888 | 0.005486 | 0.005899 | 0.002537 | 0.006135 | 0.007669 | 0.012920 | 0.005545 | 0.005663 | 0.012330 | 0.014099 | 0.005781 | 0.000708 | 0.007256 | 0.007256 | 0.002714 |
|   | CT | 0.001357 | 0.003776 | 0.002832 | 0.002478 | 0.004955 | 0.005191 | 0.007551 | 0.004837 | 0.006312 | 0.006961 | 0.012271 | 0.005840 | 0.000472 | 0.002360 | 0.002124 | 0.001180 |
|   | GA | 0.001888 | 0.003363 | 0.002183 | 0.001121 | 0.004425 | 0.003953 | 0.004543 | 0.003717 | 0.005309 | 0.006194 | 0.006607 | 0.004307 | 0.000177 | 0.003363 | 0.002419 | 0.001770 |
|   | GC | 0.002360 | 0.007197 | 0.007551 | 0.004130 | 0.004601 | 0.006017 | 0.008259 | 0.006076 | 0.007905 | 0.012684 | 0.017521 | 0.006548 | 0.000885 | 0.008495 | 0.006902 | 0.003009 |
|   | GG | 0.003127 | 0.005427 | 0.005073 | 0.003304 | 0.010914 | 0.009911 | 0.017934 | 0.009203 | 0.007138 | 0.011386 | 0.018819 | 0.008967 | 0.001003 | 0.005191 | 0.006076 | 0.003127 |
|   | GT | 0.001534 | 0.003304 | 0.003304 | 0.002832 | 0.006017 | 0.004425 | 0.005840 | 0.004130 | 0.004601 | 0.005250 | 0.007197 | 0.004896 | 0.000649 | 0.003540 | 0.003540 | 0.001475 |
|   | TA | 0.000472 | 0.000944 | 0.000590 | 0.000472 | 0.000531 | 0.000885 | 0.001475 | 0.000531 | 0.001239 | 0.001770 | 0.001416 | 0.000767 | 0.000118 | 0.000885 | 0.000295 | 0.000590 |
|   | TC | 0.001593 | 0.004425 | 0.005840 | 0.003127 | 0.003304 | 0.003835 | 0.005899 | 0.002242 | 0.002773 | 0.006961 | 0.006666 | 0.003540 | 0.000177 | 0.006607 | 0.005781 | 0.002065 |
|   | TG | 0.000767 | 0.003481 | 0.003304 | 0.001298 | 0.001652 | 0.004071 | 0.008554 | 0.002655 | 0.002242 | 0.006135 | 0.006961 | 0.002537 | 0.000295 | 0.007492 | 0.005899 | 0.001829 |
|   | TT | 0.000826 | 0.002832 | 0.001357 | 0.001947 | 0.001652 | 0.002891 | 0.002655 | 0.002419 | 0.002596 | 0.003776 | 0.004543 | 0.002655 | 0.000236 | 0.003068 | 0.002537 | 0.002006 |
|   |    |          |          |          |          |          |          |          |          |          |          |          |          |          |          |          |          |
|   |    | AA       | AC       | AG       | AT       | CA       | CC       | CG       | CT       | GA       | GC       | GG       | GT       | TA       | TC       | TG       | TT       |
| G | AA | 0.001255 | 0.001711 | 0.000912 | 0.000627 | 0.001141 | 0.001711 | 0.002680 | 0.001768 | 0.001825 | 0.001654 | 0.001939 | 0.001026 | 0.000627 | 0.001141 | 0.000969 | 0.000456 |
|   | AC | 0.001882 | 0.004619 | 0.003136 | 0.002167 | 0.003193 | 0.006045 | 0.004676 | 0.002566 | 0.002908 | 0.007299 | 0.004562 | 0.004334 | 0.001255 | 0.003650 | 0.003878 | 0.001312 |
|   | AG | 0.001312 | 0.003136 | 0.002965 | 0.001654 | 0.001255 | 0.004676 | 0.004163 | 0.001768 | 0.001939 | 0.006216 | 0.003022 | 0.002281 | 0.001312 | 0.003764 | 0.003992 | 0.001141 |
|   | AT | 0.001996 | 0.002281 | 0.001198 | 0.001654 | 0.001198 | 0.003250 | 0.003365 | 0.001654 | 0.001825 | 0.004277 | 0.002623 | 0.002965 | 0.000570 | 0.001711 | 0.001654 | 0.000513 |
|   | CA | 0.001426 | 0.002737 | 0.001711 | 0.001654 | 0.003650 | 0.005474 | 0.006672 | 0.005018 | 0.002566 | 0.004505 | 0.006387 | 0.004961 | 0.000741 | 0.002623 | 0.002395 | 0.000969 |
|   | CC | 0.003365 | 0.004961 | 0.005589 | 0.003193 | 0.004220 | 0.010036 | 0.011861 | 0.004733 | 0.004847 | 0.014599 | 0.010265 | 0.007698 | 0.001141 | 0.004733 | 0.007870 | 0.003022 |
|   | CG | 0.003193 | 0.006216 | 0.004277 | 0.003422 | 0.006729 | 0.020244 | 0.018248 | 0.005703 | 0.004106 | 0.013173 | 0.011177 | 0.006273 | 0.002110 | 0.007584 | 0.011804 | 0.002794 |
|   | CT | 0.001597 | 0.004049 | 0.002053 | 0.003022 | 0.002737 | 0.004562 | 0.007014 | 0.007128 | 0.003593 | 0.007185 | 0.006102 | 0.004733 | 0.000684 | 0.001996 | 0.002224 | 0.001654 |
|   | GA | 0.001768 | 0.002338 | 0.001768 | 0.001768 | 0.003479 | 0.003878 | 0.004505 | 0.003650 | 0.004106 | 0.004334 | 0.004277 | 0.003365 | 0.000855 | 0.002509 | 0.002110 | 0.001312 |
|   | GC | 0.003307 | 0.004505 | 0.004277 | 0.004676 | 0.005531 | 0.009124 | 0.012432 | 0.007014 | 0.005931 | 0.017336 | 0.012318 | 0.008269 | 0.001255 | 0.006729 | 0.007413 | 0.003650 |
|   | GG | 0.001939 | 0.003307 | 0.002965 | 0.003136 | 0.006045 | 0.012203 | 0.013572 | 0.004448 | 0.003821 | 0.009295 | 0.006216 | 0.006159 | 0.000969 | 0.005817 | 0.008839 | 0.001939 |
|   | GT | 0.001882 | 0.003935 | 0.004163 | 0.003536 | 0.004049 | 0.006615 | 0.005589 | 0.005018 | 0.004733 | 0.008611 | 0.006729 | 0.005646 | 0.001483 | 0.003536 | 0.002509 | 0.001882 |
|   | TA | 0.000171 | 0.001141 | 0.000912 | 0.000684 | 0.000342 | 0.001026 | 0.002053 | 0.000342 | 0.000456 | 0.001255 | 0.000912 | 0.000798 | 0.000342 | 0.000513 | 0.000684 | 0.000456 |
|   | TC | 0.002851 | 0.003878 | 0.005474 | 0.003878 | 0.002167 | 0.006273 | 0.007641 | 0.003022 | 0.003479 | 0.011975 | 0.007527 | 0.004049 | 0.001540 | 0.006330 | 0.005246 | 0.002623 |
|   | TG | 0.001939 | 0.003821 | 0.003593 | 0.002224 | 0.002395 | 0.009238 | 0.008953 | 0.002851 | 0.001654 | 0.007299 | 0.005246 | 0.002794 | 0.001026 | 0.005760 | 0.006900 | 0.001882 |
|   | TT | 0.001026 | 0.001198 | 0.001369 | 0.000912 | 0.000684 | 0.001996 | 0.001597 | 0.001255 | 0.001255 | 0.003307 | 0.001483 | 0.002053 | 0.000855 | 0.001711 | 0.001141 | 0.000912 |
|   |    |          |          |          |          |          |          |          |          |          |          |          |          |          |          |          |          |
| T |    | AA       | AC       | AG       | AT       | CA       | CC       | CG       | CT       | GA       | GC       | GG       | GT       | TA       | TC       | TG       | TT       |
|   | AA | 0.000115 | 0.000345 | 0.000806 | 0.000115 | 0.001612 | 0.002302 | 0.001842 | 0.001151 | 0.000806 | 0.001381 | 0.002878 | 0.000691 | 0.000000 | 0.001151 | 0.000345 | 0.000691 |
|   | AC | 0.000115 | 0.001727 | 0.000230 | 0.000115 | 0.002533 | 0.007482 | 0.007943 | 0.001151 | 0.003223 | 0.004489 | 0.004029 | 0.001036 | 0.000345 | 0.004489 | 0.003108 | 0.001381 |
|   | AG | 0.000230 | 0.002417 | 0.001612 | 0.000921 | 0.001727 | 0.006101 | 0.004835 | 0.001266 | 0.001036 | 0.005295 | 0.005065 | 0.000691 | 0.000000 | 0.004029 | 0.001842 | 0.000345 |
|   | AT | 0.000000 | 0.000345 | 0.000000 | 0.000230 | 0.001612 | 0.002648 | 0.002417 | 0.001727 | 0.000691 | 0.000921 | 0.000691 | 0.000921 | 0.000460 | 0.001957 | 0.000576 | 0.001151 |
|   | CA | 0.000691 | 0.000691 | 0.001151 | 0.000345 | 0.007598 | 0.010475 | 0.011281 | 0.005295 | 0.006792 | 0.007022 | 0.009555 | 0.003799 | 0.000115 | 0.001957 | 0.001957 | 0.001036 |
|   | CC | 0.000460 | 0.002993 | 0.001036 | 0.000806 | 0.007022 | 0.013699 | 0.023023 | 0.003914 | 0.007713 | 0.013929 | 0.015310 | 0.005871 | 0.000806 | 0.008634 | 0.006562 | 0.001266 |
|   | CG | 0.000806 | 0.002763 | 0.005756 | 0.000921 | 0.007022 | 0.013468 | 0.016576 | 0.006677 | 0.010130 | 0.013238 | 0.019224 | 0.006331 | 0.001151 | 0.011166 | 0.007252 | 0.001957 |
|   | CT | 0.000230 | 0.000230 | 0.000806 | 0.000230 | 0.005295 | 0.006101 | 0.010360 | 0.006677 | 0.003108 | 0.005180 | 0.008173 | 0.003569 | 0.000576 | 0.002763 | 0.002187 | 0.001036 |
|   | GA | 0.000806 | 0.002417 | 0.001036 | 0.000806 | 0.008173 | 0.010245 | 0.011051 | 0.005410 | 0.006101 | 0.009785 | 0.010245 | 0.004029 | 0.000460 | 0.004489 | 0.000806 | 0.001957 |
|   | GC | 0.000576 | 0.002417 | 0.000806 | 0.000691 | 0.009900 | 0.013238 | 0.019915 | 0.005180 | 0.007943 | 0.016461 | 0.018188 | 0.004835 | 0.000115 | 0.008634 | 0.005641 | 0.002878 |
|   | GG | 0.001036 | 0.003453 | 0.004374 | 0.002417 | 0.011051 | 0.010706 | 0.016346 | 0.008518 | 0.013353 | 0.018303 | 0.021757 | 0.010936 | 0.000576 | 0.006562 | 0.006331 | 0.001957 |
|   | GT | 0.000115 | 0.000806 | 0.000806 | 0.000345 | 0.004835 | 0.007598 | 0.009785 | 0.005065 | 0.003684 | 0.004029 | 0.005986 | 0.004489 | 0.000460 | 0.002763 | 0.001381 | 0.000806 |
|   | TA | 0.000000 | 0.000921 | 0.000576 | 0.000115 | 0.000921 | 0.000576 | 0.001842 | 0.000691 | 0.000460 | 0.001151 | 0.000576 | 0.000576 | 0.000115 | 0.000806 | 0.000115 | 0.000460 |
|   | TC | 0.000000 | 0.001842 | 0.000576 | 0.000806 | 0.001266 | 0.008634 | 0.010130 | 0.002417 | 0.002993 | 0.008288 | 0.005871 | 0.001957 | 0.000230 | 0.006446 | 0.004605 | 0.000921 |
|   | TG | 0.000576 | 0.001612 | 0.004259 | 0.000691 | 0.001842 | 0.009670 | 0.004605 | 0.001727 | 0.002302 | 0.006101 | 0.005295 | 0.001381 | 0.000345 | 0.005641 | 0.002878 | 0.001151 |
|   | TT | 0.000000 | 0.000576 | 0.000806 | 0.000115 | 0.001957 | 0.002417 | 0.003684 | 0.001381 | 0.001727 | 0.001151 | 0.001496 | 0.000576 | 0.000000 | 0.002072 | 0.000806 | 0.001266 |

### C. References

- [1] G. S. Myers, D. A. Rasko, J. K. Cheung, J. Ravel, R. Seshadri, R. T. Deboy, Q. Ren, J. Varga, M. M. Awad, L. M. Brinkac, S. C. Daugherty, D. H. Haft, R. J. Dodson, R. Madupu, W. C. Nelson, M. J. Rosovitz, S. A. Sullivan, H. Khouri, G. I. Dimitrov, K. L. Watkins, S. Mulligan, J. Benton, D. Radune, D. J. Fisher, H. S. Atkins, T. Hiscox, B. H. Jost, S. J. Billington, J. G. Songer, B. A. McClane, R. W. Titball, J. I. Rood, S. B. Melville, I. T. Paulsen, *Genome Res.* **2006**, *16* 1031.
- [2] D. A. Rasko, M. Rosovitz, J. B. Kaper, J. P. Nataro, G. S. Myers, R. Seshadri, R. Z. Cer, J. Ravel, in *National Center for Biotechnology Information - GenBank*, **2007**.
- [3] B. G. S. a. A. Consortium, C. Elisk, R. Tellam, et. al, *Science* **2009**, *324*, 522.
- [4] Z. Zhong, R. Caspi, T. Mincer, D. Helinsk, V. Knauf, K. Boardman, J. E. Wilkinson, T. Shea, C. DeLoughery, A. Toukdarian, *Plasmid* **2002**, *47*, 1.
